1 **Title:** Reference nodule transcriptomes for *Melilotus officinalis* and *Medicago sativa* cv.  
2 Algonquin

3

4 **Authors:** Rui Huang, Wayne A Snedden, George C diCenzo\*

5

6 **Affiliation:** Department of Biology, Queen's University, Kingston, Ontario, Canada

7

8 \* **Corresponding author:** George C. diCenzo

9 Queen's University, Department of Biology

10 Biosciences Complex, Room 2433

11 116 Barrie Street

12 Kingston, ON, K7P0S7, Canada

13 [george.dicenzo@queensu.ca](mailto:george.dicenzo@queensu.ca)

14 +1 (613) 533-6000 x78529

## ABSTRACT

15  
16 Host/symbiont compatibility is a hallmark of the symbiotic nitrogen-fixing interaction between  
17 rhizobia and legumes, mediated in part by plant produced nodule-specific cysteine-rich (NCR)  
18 peptides and the bacterial BacA membrane protein that can act as a NCR peptide transporter. In  
19 addition, the genetic and metabolic properties supporting symbiotic nitrogen fixation often differ  
20 between compatible partners, including those sharing a common partner, highlighting the need for  
21 multiple study systems. Here, we report high quality nodule transcriptome assemblies for  
22 *Medicago sativa* cv. Algonquin and *Melilotus officinalis*, two legumes able to form compatible  
23 symbioses with *Sinorhizobium meliloti*. The compressed *M. sativa* and *M. officinalis* assemblies  
24 consisted of 79,978 and 64,593 contigs, respectively, of which 33,341 and 28,278 were assigned  
25 putative annotations, respectively. As expected, the two transcriptomes showed broad similarity at  
26 a global level. We were particularly interested in the NCR peptide profiles of these plants, as these  
27 peptides drive bacterial differentiation during the symbiosis. A total of 412 and 308 NCR peptides  
28 were predicted from the *M. sativa* and *M. officinalis* transcriptomes, respectively, with  
29 approximately 9% of the transcriptome of both species consisting of NCR transcripts. Notably,  
30 transcripts encoding highly-cationic NCR peptides (isoelectric point > 9.5), which are known to  
31 have antimicrobial properties, were ~2-fold more abundant in *M. sativa* than in *M. officinalis*, and  
32 ~27-fold more abundant when considering only NCR peptides in the six-cysteine class. We  
33 hypothesize that the difference in abundance of highly-cationic NCR peptides explains our  
34 previous observation that some rhizobial *bacA* alleles which can support symbiosis with *M.*  
35 *officinalis* are unable to support symbiosis with *M. sativa*.

36

37 **Keywords:** NCR peptides, symbiotic nitrogen fixation, legumes, rhizobia, transcriptomics

38

## INTRODUCTION

39 Leguminous plants are able to establish symbiotic relationships with a group of soil bacteria known  
40 as rhizobia. During the interaction, the rhizobia are located within a specialized organ known as a  
41 nodule where they fix atmospheric nitrogen into ammonia in exchange for reduced carbon from  
42 their host. Symbiosis is initiated following an exchange of chemical signals in the rhizosphere  
43 between compatible partners (1): legumes secrete flavonoids that attract soil rhizobia and induce  
44 expression of rhizobial *nod* genes, leading to rhizobial production of chito-oligosaccharide Nod  
45 factors that elicit the nodulation process by legumes. This process involves the curling of root hairs  
46 to trap rhizobia, and the formation of infection threads within which rhizobia divide and move  
47 toward the root cortical layer (2). Rhizobia released from infection threads are endocytosed into  
48 the cytoplasm of nodule cells, where they develop into mature N<sub>2</sub>-fixing bacteroids. In some  
49 legumes, such as those belonging to the Inverted Repeat Lacking Clade (IRLC), the rhizobia  
50 undergo an irreversible host-induced process known as terminal differentiation that is largely  
51 driven by a unique class of legume proteins known as nodule-specific cysteine-rich (NCR)  
52 peptides (3). Terminal differentiation involves cell enlargement, genome endoreplication, and  
53 increased membrane permeability, and is thought to increase the efficiency of N<sub>2</sub>-fixation (4–6).

54 Not all rhizobium/legume pairings are compatible (7, 8). Partner compatibility is  
55 determined by numerous factors impacting both early and late stages of the symbiotic interaction  
56 (9). The flavonoids secreted by legumes vary, as does the ability of rhizobia to respond to different  
57 flavonoids (10–13). Similarly, the Nod factor produced by rhizobia differ and legume hosts  
58 respond only to Nod factors with specific structures (14). Moreover, legume infection depends on  
59 rhizobia producing particular host-compatible exopolysaccharide molecules (15, 16), and  
60 variations in exopolysaccharide structure can impact specificity at the level of plant ecotype and  
61 bacterial strain (17). In addition, some rhizobia secrete effector proteins that induce effector-  
62 triggered immune responses in a cultivar-specific manner, thereby influencing host range (18–20).  
63 Moreover, for IRLC legumes, an effective symbiotic interaction requires compatibility between  
64 the host-produced NCR peptides and the rhizobial membrane protein BacA (21–24).

65 NCR peptides are a large class of legume-specific proteins, with ~ 600 members in  
66 *Medicago truncatula* (25). These proteins display little conservation in amino acid composition  
67 but possess four or six cysteine residues at conserved positions (26). The length of mature NCR  
68 peptides varies from about 20 to 50 amino acids and includes two or three disulfide bridges (27).  
69 NCR peptides can be classified as either cationic (isoelectric point [pI] ≥ 8), neutral (6 ≤ pI < 8),  
70 or anionic (pI < 6) (27). Highly cationic peptides (pI ≥ 9.0) display antimicrobial activity *in vitro*,  
71 likely through disrupting microbial membranes, thereby leading to permeabilization and cell lysis  
72 (28, 29). *In planta*, NCR peptides are required for rhizobium terminal differentiation and an  
73 effective symbiosis in IRLC legumes (3). Deletion of individual *NCR* genes is sufficient to block  
74 N<sub>2</sub>-fixation (30, 31); however, mutation of other *NCR* genes can result in N<sub>2</sub>-fixation in previously  
75 incompatible symbioses (21, 22), demonstrating the role of NCR peptides in partner compatibility.

76 The ability of rhizobia to establish an effective symbiosis with IRLC legumes requires the  
77 membrane protein BacA (32). BacA functions as a peptide transporter (33), and *bacA* deletion

78 mutants are both unable to import NCR peptides and show increased sensitivity to cationic NCR  
79 peptides (34–36). In addition, rhizobium *bacA* mutants are unable to fix nitrogen in symbiosis with  
80 IRLC legumes; instead, the rhizobia are quickly killed in a NCR peptide-dependent fashion upon  
81 release from the infection threads (32, 34). Intriguingly, BacA appears to be a host-range  
82 determinant factor in IRLC legumes. For example, studies have shown that introduction of the  
83 *bacA* or *bacA*-like genes of *Mesorhizobium loti* and *Bradyrhizobium* species into a *Sinorhizobium*  
84 *meliloti* *bacA* mutant is insufficient to allow N<sub>2</sub>-fixation during interaction with IRLC legumes of  
85 the genus *Medicago* (35, 37). Similarly, we previously demonstrated that replacement of the *S.*  
86 *meliloti* *bacA* with the *bacA* alleles of *Sinorhizobium fredii* NGR234 or *Rhizobium leguminosarum*  
87 bv. *viciae* 3841 does not allow for N<sub>2</sub>-fixation during symbiosis with *Medicago sativa* (alfalfa) but  
88 does support N<sub>2</sub>-fixation on the IRLC legumes *Melilotus alba* (white sweet clover) and *Melilotus*  
89 *officinalis* (yellow sweet clover) ((24) and **Table S1**).

90 In addition to the above-noted comparison, several symbiotic differences have been  
91 observed when *S. meliloti* mutants interact with *Medicago* versus *Melilotus* plants (38–41),  
92 suggesting that *Melilotus* plants are a valuable secondary model system to study the symbiotic  
93 properties of *S. meliloti*. To further develop *M. officinalis* as a model species for studying  
94 symbiosis, here we report a reference nodule transcriptome for *M. officinalis*. We further compare  
95 the characteristics and the expression of NCR genes between *M. officinalis* and *M. sativa* to  
96 investigate whether the ability of certain *bacA* alleles to support symbiosis with *Melilotus* but not  
97 *Medicago* plants is correlated with differences in the NCR peptide profile of these genera.

98

99

## MATERIALS AND METHODS

### 100 Plant materials and sample collection

101 *M. sativa* cv. Algonquin (alfalfa) and *M. officinalis* (yellow blossom sweet clover) seeds were  
102 purchased from Speare Seeds Limited (Harriston, Ontario, Canada). Seeds were surface sterilized  
103 with 95% ethanol for five minutes followed by 2.5% hypochlorite for 20 minutes, and then soaked  
104 in sterile double-distilled water (ddH<sub>2</sub>O) for one hour. The sterilized seeds were plated on 1X water  
105 agar plates and incubated at room temperature in the dark for two days. Five germinated seeds  
106 were placed in autoclaved Leonard Assemblies consisting of two Magenta Jars with a cotton wick  
107 extending from the top jar (containing vermiculite mixed with silica sand [1:1 w/w]) into the  
108 bottom jar (containing 250 mL of Jensen's media (42)), and then incubated in a Conviron growth  
109 chamber for two nights. Wildtype *S. meliloti* strain Rm2011 was grown overnight at 30°C in LBmc  
110 broth (10 g L<sup>-1</sup> tryptone, 5 g L<sup>-1</sup> yeast extract, 5 g L<sup>-1</sup> NaCl, 2.5 mM CaCl<sub>2</sub>, and 2.5 mM MgCl<sub>2</sub>),  
111 washed with 0.85% NaCl, and diluted to a density of ~ 1x10<sup>7</sup> CFU mL<sup>-1</sup> in sterile ddH<sub>2</sub>O. Ten mL  
112 of cell suspension was then added to each Leonard Assembly. Plants were grown in a Conviron  
113 growth chamber with a day (18 hours, 21°C, light intensity of 300 μmol m<sup>-2</sup> s<sup>-1</sup>) and night (6 hours,  
114 17°C) cycle. Root nodules were collected four weeks post-inoculation and immediately flash  
115 frozen with liquid N<sub>2</sub> and stored at -80°C until use. All nodules collected from plants grown in the  
116 same Leonard Assembly were stored in a single tube and treated as one replicate. The shoots from  
117 each pot were dried at 60°C for two weeks prior to measuring shoot dry weight (**Table S2**).

## 118 **RNA extraction and sequencing**

119 Total RNA from three replicates of frozen *M. sativa* and *M. officinalis* nodule tissue was extracted  
120 using Direct-zol RNA miniprep kits (ZYMO Research) according to the manufacturer's protocol.  
121 Total RNA samples were treated with DNase I (New England Biolabs) to degrade any  
122 contaminating DNA according to the manufacturer's protocol, and the RNA again purified using  
123 Direct-zol RNA miniprep kits. Total RNA samples were run on a MOPS-formaldehyde agarose  
124 gel (119 mL MOPS buffer [200 mM MOPS, 80 mM sodium acetate, 10 mM EDTA, pH 7.0, in  
125 DEPC-treated ddH<sub>2</sub>O], 6 mL formaldehyde, 1.25 g agarose) to check the integrity of the RNA  
126 (**Figure S1**), and subsequently verified using an Agilent Bioanalyzer chip.

127 Library preparation and Illumina sequencing were performed at The Centre for Applied  
128 Genomics at The Hospital for Sick Children (Toronto, Ontario, Canada). Libraries were prepared  
129 using the NEB Next<sup>®</sup> Ultra<sup>™</sup> II Directional RNA Library Prep Kit for Illumina<sup>®</sup>. Libraries were  
130 then sequenced using one lane of a high throughput flow cell on an Illumina HiSeq 2500 platform,  
131 generating 125 bp paired-end reads.

132

## 133 **Transcriptome *de novo* assembly and quality control**

134 The nodule transcriptomes of *M. sativa* and *M. officinalis* were *de novo* assembled following the  
135 same procedure. First, reads from the triplicate samples were combined, and then preprocessing of  
136 the raw reads was performed to ensure only high-quality data was used for *de novo* transcriptome  
137 assembly. Read quality was initially evaluated using FastQC version 0.11.9 (43), following which  
138 errors in raw reads were identified and corrected by the k-mer based method of Rcorrector version  
139 1.0.4 (44). The FilterUncorrectablePEfastq.py script  
140 ([github.com/harvardinformatics/TranscriptomeAssemblyTools/](https://github.com/harvardinformatics/TranscriptomeAssemblyTools/)) was used to remove any read pair  
141 where at least one read had an unfixable error identified by Rcorrector. Adaptors sequences, short  
142 reads (< 25 bp), and low-quality reads (Q score < 20) were removed using Trim Galore version  
143 0.6.6 ([bioinformatics.babraham.ac.uk/projects/trim\\_galore/](https://bioinformatics.babraham.ac.uk/projects/trim_galore/)), which is a wrapper calling cutadapt  
144 version 3.2 (45) and FastQC (**Table 1**). The processed reads were further trimmed by  
145 Trimmomatic version 0.4.0 (46) included in the Trinity software distribution with the following  
146 parameters: *SLIDINGWINDOW:5:20 LEADING:3 TRAILING:3 MINLEN:25*. The quality and  
147 presence of adaptors in the preprocessed reads were then examined using FastQC. Following  
148 preprocessing, 174,707,055 and 119,333,821 paired end reads (~43.7 and ~29.8 Gb, respectively)  
149 remained for *M. sativa* and *M. officinalis*, respectively (**Table S3**).

150 The preprocessed reads were assembled using Trinity version 2.9.0 without genome  
151 guidance (47). Then, the assembled contigs were clustered into gene-level clusters using  
152 SuperTranscripts (48). Gene isoforms were identified by Corset version 1.09 with the log  
153 likelihood ratio threshold set to very high (49). Based on the Corset clusters, Lace version 1.14.1  
154 was used to merge the gene isoforms into single long supertranscripts meant to provide a gene-  
155 like view of the transcriptome (48).

156 Multiple methods were used to examine the quality of the Trinity and SuperTranscript  
157 assemblies. First, the alignment rates of the preprocessed reads to the assemblies were inspected

158 using STAR version 2.7.8a with the two-pass mode that is more sensitive to alternative splicing  
159 (50). Second, assembly statistics such as N50 and number of contigs were calculated using the  
160 seqstats software ([github.com/clwgg/seqstats](https://github.com/clwgg/seqstats)). Third, the completeness of the assemblies was  
161 evaluated using BUSCO version 5.1.2, run separately using the OrthoDB v10 ‘Fabales’ and  
162 ‘Viridiplantae’ reference databases (51). The assemblies were also compared to the *S. meliloti*  
163 Rm2011 genome (52) using BLASTn version 2.5.0+ (53), which confirmed the absence of  
164 contaminating *S. meliloti* transcripts in the assemblies. Finally, the *M. sativa de novo* assembly  
165 was aligned to a publicly-available genome of *M. sativa* cultivar XinJiangDaYe (54) with  
166 MUMmer version 4.0+, and 87.3% of transcripts were successfully aligned to the genome.

167

### 168 **Transcriptome annotation**

169 Coding regions within the supertranscripts were predicted by TransDecoder version 5.5.0  
170 ([github.com/TransDecoder/TransDecoder](https://github.com/TransDecoder/TransDecoder)), using the results of BLASTp searches (E-value cutoff  
171 of 1e-5) against the Uniport database as ORF retention criteria (2021 January release) (55). The  
172 functional annotation of the predicted coding sequences then proceeded via three steps. First,  
173 BLAST bidirectional best hits between the *M. truncatula* A17 proteome (assembly release r5.0  
174 1.7) (56) and the longest predicted protein isoform of each contig of our transcriptome assemblies  
175 were identified using BLASTp (E-value cutoff of 1e-5, culling limit 1). For all bidirectional best  
176 hits, the annotations from *M. truncatula* A17 were transferred to the corresponding contigs of the  
177 *M. sativa* or *M. officinalis* transcriptome. Second, all predicted protein isoforms of each contig in  
178 each transcriptome assembly were annotated using eggNOG-mapper version 2.1.0 with  
179 DIAMOND version 2.0.4 and the Viridiplantae dataset (E-value cutoff of 1e-3) (57, 58). Third,  
180 for each contig not annotated by BLAST or eggNOG-mapper, the hmmsearch function of  
181 HMMER version 3.3.2 was used to search all predicted protein isoforms against the complete set  
182 of hidden Markov models (HMMs) from the Pfam version 34.0 database and separately against  
183 the TIGRFAM version 15.0 HMM database (E-value cutoff of 1e-5) (59–61), and results were  
184 filtered to remove annotations with a Bit-score < 50. For repetitive annotations from isoforms of a  
185 gene, only the consensus annotations were retained. For contigs successfully annotated by more  
186 than one of the annotation methods, results from the bidirectional BLAST took priority, followed  
187 by the results of eggNOG-mapper, then the Pfam searches, and finally the TIGRFAM searches.

188

### 189 **NCR peptide identification**

190 Considering the high degree of sequence diversity of NCR peptide sequences, the functional  
191 annotation methods described above were not sufficiently sensitive to discover genes encoding  
192 NCR peptides in the assemblies. Therefore, the SPADA version 1.0 pipeline was used to identify  
193 NCR peptides (62). SPADA is specialized to predict cysteine-rich peptides in plant genomes and  
194 is distributed with a *M. truncatula* prediction model. Cysteine-rich peptides in the *M. sativa* and  
195 *M. officinalis* assemblies were predicted using the SPADA pipeline with following software:  
196 HMMER version 3.0, Augustus version 2.6, GeneWise version 2.2.0, GeneMark.hmm eukaryotic  
197 version 3.54, GlimmerHMM version 3.0.1, and GeneID version 1.1 (63–66). The putative NCR

198 peptide sequences were filtered to remove those without a signal peptide, and then further filtered  
199 based on the E-value (cutoff of  $1e-5$ ) and hmm score (cutoff of 50). Filtered sequences were then  
200 verified via hmmscan searches against the Pfam database, and they were aligned using Clustal  
201 Omega version 1.2.4 (67) to ensure the presence of the signature cysteine motif and N terminal  
202 signal peptide that are present in *bona fide* NCR peptides.

203

### 204 **NCR peptides classification**

205 To predict the lengths of mature NCR peptides, signalP version 4.1g with the notm network was  
206 used to predicted cleavage sites and extract mature NCR peptides (68), and the number of cysteine  
207 residues in each motif were counted. The pI values of the NCR peptides were predicted using the  
208 pIR R package, and the value for each peptide was calculated based on the mean values from all  
209 prediction methods excluding the highest and lowest values (69).

210

### 211 **Gene-expression level estimation and differential expression analysis**

212 Gene-expression levels of each *M. sativa* and *M. officinalis* replicate transcriptome were estimated  
213 by transcript abundance estimation using salmon version 0.12.0 in mapping-based mode (library  
214 type automatic, validate Mapping) (70) and the reference transcriptomes produced as described  
215 above. R package *deseq2* version 1.32.0 (71) was used to perform differential expression analysis  
216 between *M. sativa* and *M. officinalis*, using the raw counts from salmon, the length of each gene  
217 in each species as an additional parameter during normalization, and limiting the analysis to one-  
218 to-one orthologs identified by OrthoFinder version 2.5.2 (72). OrthoFinder was run with default  
219 settings using the total predicted *M. sativa* and *M. officinalis* proteomes including all isoforms,  
220 following which orthologs were reduced to one per supertranscript.

221

### 222 **Gene Ontology term analysis**

223 The Gene Ontology (GO) terms for *M. sativa* and *M. officinalis* were obtained from the *M.*  
224 *truncatula* A17 proteome (assembly release r5.0 1.7) and annotations from eggNOG-mapper. For  
225 transcripts annotated with GO terms from both sources, the concensus GO term annotations were  
226 retained. Then, the GO terms were reduced based on the Generic GO subset (download 10 August  
227 2021).

228

### 229 **Software information**

230 All analyses were performed in an Ubuntu 20.04.2 LTS (Linux 5.8.0-48-generic) operation system  
231 or on the Compute Canada Graham cluster. Custom scripts were written in Python version 3.8.5  
232 and bash. R version 3.6.3 was used during data analysis (73).

233

### 234 **Data availability**

235 All custom scripts to perform the analyses described in this study are available through GitHub  
236 ([https://github.com/hyhy8181994/Nodule\\_transcriptome\\_script](https://github.com/hyhy8181994/Nodule_transcriptome_script)). Raw Illumina data are available  
237 through the Short Read Archive (SRR15724671, SRR15724670, SRR15724669, SRR15724668,

238 SRR15724667, and SRR15724666) hosted by the National Center for Biotechnology Information  
239 (NCBI). The assembled transcriptomes are available through the Transcriptome Shotgun  
240 Assembly Sequence Database (GJLW00000000 and GJLK00000000) hosted by the NCBI.

241

242

243

## RESULTS AND DISCUSSION

### 244 **Reference nodule transcriptomes for *Melilotus officinalis* and *Medicago sativa* cv. Algonquin**

245 To establish reference nodule transcriptomes of *M. sativa* cv. Algonquin and *M. officinalis* during  
246 symbiosis with *S. meliloti* Rm2011, the poly-A enriched RNA from triplicate samples was  
247 sequenced using Illumina technology (2x125 bp paired-end reads), generating ~50 Gb (~ 202  
248 million paired-end reads) and ~35 Gb (~139 million paired-end reads) of data for *M. sativa* and *M.*  
249 *officinalis*, respectively (see **Table S3** for sequencing statistics). *De novo* assembly of the *M. sativa*  
250 sequencing data resulted in 253,871 contigs, while 192,165 *de novo* assembled contigs were  
251 produced for *M. officinalis*. Contigs expected to represent splice variants of a single gene were  
252 merged into so-called “supertranscripts” using the SuperTranscripts program, resulting in  
253 compressed assemblies of 79,978 and 64,593 contigs for *M. sativa* and *M. officinalis*, respectively  
254 (**Table 1**). Transcriptomes were annotated as described in the Materials and Methods, resulting in  
255 putative annotations for 33,431 *M. sativa* contigs and 28,278 *M. officinalis* contigs (**Datasets S1**  
256 **and S2**). Of these, ~ 52% (*M. sativa*) and ~ 58% (*M. officinalis*) are high confidence annotations  
257 as they were transferred from the *M. truncatula* whole genome annotation following identification  
258 of putative orthologs using a BLAST bidirectional best hit approach (**Table S4**). Considering that  
259 previous studies have predicted the presence of ~23,000 long non-coding RNAs (lncRNAs) in *M.*  
260 *truncatula* (74) and ~47,000 lncRNAs in the legume *Pisum sativum* (pea) (75), we hypothesize  
261 that the majority of the unannotated *M. sativa* and *M. officinalis* transcripts reflect lncRNAs.

262 All of the examined assembly summary statistics (mean and median contig length, contig  
263 N50) were improved in the compressed assemblies compared to the original *de novo* assemblies,  
264 indicating that the compressed assemblies are of higher structural quality (**Table 1**). The *M. sativa*  
265 transcriptome summary statistics, such as N50 and transcript length, are consistent with those  
266 reported for other *M. sativa de novo* transcriptome assemblies, although the number of transcripts  
267 varies likely due to each study examining different tissues (76, 77). In addition, the assemblies  
268 appear to be robust; greater than 90% of the filtered reads used for transcriptome assembly could  
269 be mapped to the corresponding assemblies by STAR (**Table 1**). Moreover, > 92% and > 83% of  
270 the Viridiplantae and Fabales BUSCO marker genes, respectively, were identified as complete and  
271 single-copy in the *M. sativa* and *M. officinalis* compressed assemblies (**Figure 1**). The structural  
272 quality (e.g. high average and median contig length and N50) and BUSCO benchmark scores  
273 described here are in line with those reported for other plant *de novo* transcriptome assemblies  
274 (78–80). Taken together, these results indicate that our *M. sativa* cv. Algonquin and *M. officinalis*  
275 reference nodule transcriptomes are reliable and of high quality.

276

277



278 **Table 1.** Summary statistics from the *de novo* Trinity and compressed (SuperTranscripts) nodule  
 279 transcriptome assemblies.

|                                 | <i>M. sativa</i> |                  | <i>M. officinalis</i> |                  |
|---------------------------------|------------------|------------------|-----------------------|------------------|
|                                 | Trinity Assembly | SuperTranscripts | Trinity Assembly      | SuperTranscripts |
| Total number of contigs         | 253,871          | 79,978           | 192,165               | 64,593           |
| Total number of base pairs (bp) | 239,421,306      | 96,211,060       | 191,200,637           | 81,371,534       |
| Average contig length (bp)      | 943              | 1203             | 995                   | 1260             |
| Median contig length (bp)       | 618              | 734              | 646                   | 780              |
| Contig N50 (bp)                 | 1,466            | 1,912            | 1,584                 | 1968             |
| Minimum contig length (bp)      | 176              | 193              | 183                   | 198              |
| Maximum contig length (bp)      | 12,655           | 29,784           | 14,584                | 23,941           |
| Overall alignment rate (%)      | 98.99            | 92.14            | 99.15                 | 93.76            |

280  
 281  
 282  
 283

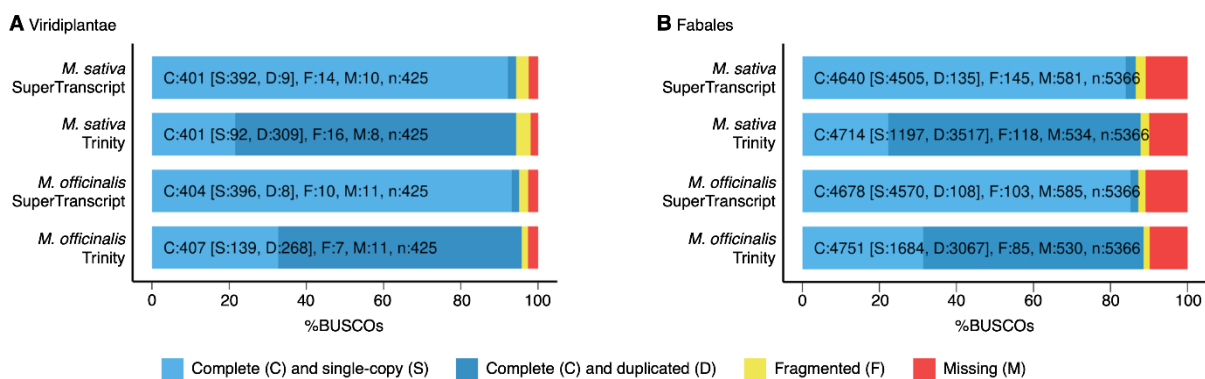

284 **Figure 1. Estimates of nodule transcriptome completeness.** Completeness of the *M. sativa* and *M.*  
 285 *officinalis* nodule transcriptome assemblies was assessed using BUSCO with the (A) Viridiplantae and (B)  
 286 Fabales single-copy marker gene datasets. The fraction of BUSCO genes identified as complete and single-  
 287 copy (light blue), complete but duplicated (dark blue), fragmented (yellow), and missing (red) is shown.

288  
 289

### 290 Comparative transcriptome analysis between *M. sativa* and *M. officinalis*

291 As an initial examination of the *M. sativa* and *M. officinalis* transcriptomes, the annotated functions  
 292 of the proteins predicted to be encoded by the supertranscripts were summarized using the Generic  
 293 GO term subset (Figure 2, Dataset S3 and S4). Approximately 18,363 (26.1%) of the *M. sativa*  
 294 supertranscripts and 16,674 (28.6%) of the *M. officinalis* supertranscripts were annotated with GO  
 295 terms. No significant difference in the GO term profiles of the two species was observed, with the  
 296 five most frequently annotated biological process GO terms being GO:0008150 (biological  
 297 process), GO:0006950 (response to stress), GO:0006464 (cellular protein modification process),  
 298 GO:003464 (cellular nitrogen compound metabolic process) and GO:0048856 (anatomical  
 299 structure development). At this broad scale, the GO term data suggest that there is substantial  
 300 similarity in the nodule transcriptomes of *M. sativa* and *M. officinalis*.

301

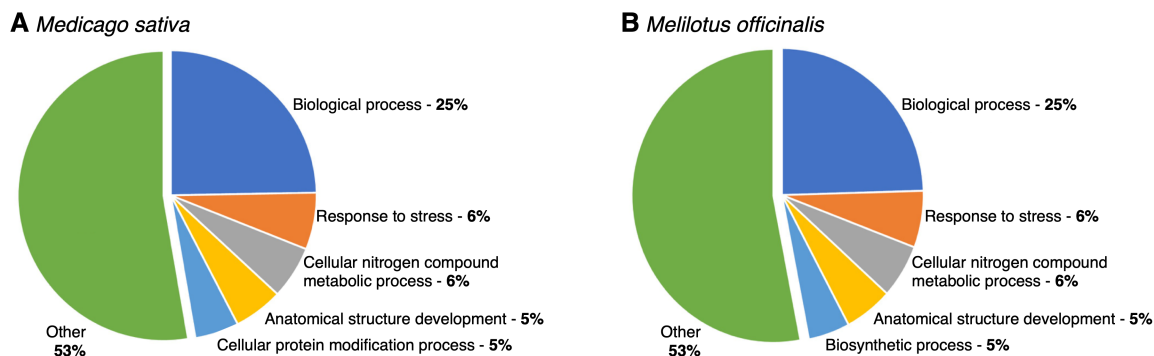

302

303 **Figure 2. Summary of the Slim GO Biological Processes annotations for the nodule transcriptomes.**

304 Transcripts were annotated with Slim GO terms, and the annotations for the biological processes were  
305 summarized as pie charts for (A) *M. sativa* and (B) *M. officinalis*.

306

307

308

309 We next examined the predicted functions of the proteins encoded by the 50 most abundant  
310 transcripts in both species (**Table 2 and 3**). Not surprisingly, these transcripts were enriched in  
311 those predicted to encode nodulins and leghaemoglobin-like proteins. Nodulins refer to diverse  
312 proteins expressed specifically in nodule tissue, which play various structural or metabolic roles  
313 during symbiotic nitrogen fixation. Among the nodulins, are the leghemoglobin proteins that  
314 account for up to 40% of the total soluble protein in legume nodules (81). Leghemoglobins play  
315 an important role in maintaining the low free-oxygen concentration required to protect the oxygen-  
316 sensitive nitrogenase enzyme (82).

317 To facilitate further comparison of the *M. sativa* and *M. officinalis* transcriptomes, the  
318 proteins predicted to be encoded by the supertranscripts of both species were arranged into  
319 orthologous groups using OrthoFinder. A total of 20,237 orthologous groups, accounting for  
320 26,304 *M. sativa* and 24,895 *M. officinalis* supertranscripts, were identified. Interestingly, the  
321 abundance of the conserved supertranscripts was significantly higher, on average, than that of the  
322 species-specific transcripts ( $p$  value  $< 2.2e-16$ ; **Figure 3**). In both plant species, the majority of the  
323 most abundant, species-specific annotated transcripts were also nodulins, globin family proteins  
324 that are likely species-specific leghaemoglobin isoforms, and some housekeeping genes such as  
325 ribonuclease and ribosomal proteins. It is noteworthy that the most abundant *M. sativa*-specific  
326 supertranscript is predicted to encode albumin I. Similarly, *M. officinalis* also has a highly-  
327 expressed albumin I supertranscript. The albumin I peptide family is known to be highly expressed  
328 in legume seeds and play roles in seed protection (83). Expression of albumin I genes has also  
329 been observed in *M. truncatula* root nodules, with expression specific to uninfected cells in the  
330 nitrogen fixation zone (84). These cells are thought to play essential roles in metabolite transport  
331 during symbiosis, and albumin I may have a role in protecting some of the nodule cells from  
332 rhizobium infection (84). A phylogenetic analysis of *M. truncatula* nodulins and albumin I peptides  
333 indicated that the *M. truncatula* albumin I clustered with a subset of nodulins, reflecting a close  
334 evolutionary relationship between these proteins (85).

335 **Table 2.** The 50 most highly abundant transcripts in the *M. sativa* nodule transcriptome, with the  
 336 average expression level in transcripts per million (TPM) and the functional annotation.

| Gene ID         | TPM    | Functional Prediction                                  |
|-----------------|--------|--------------------------------------------------------|
| Cluster-2.43518 | 30,662 | hypothetical protein (hypothetical leghaemoglobin)     |
| Cluster-2.26078 | 17,769 | Putative albumin I                                     |
| Cluster-2.23447 | 12,515 | hypothetical protein (hypothetical leghaemoglobin)     |
| Cluster-2.23176 | 8,065  | Nodulin-25                                             |
| Cluster-2.22272 | 7,992  | Putative Late nodulin                                  |
| Cluster-2.23033 | 6,778  | None                                                   |
| Cluster-2.21873 | 5,919  | hypothetical protein                                   |
| Cluster-2.22935 | 5,253  | Belongs to the globin family                           |
| Cluster-2.33070 | 5,232  | Putative ribonuclease H-like domain-containing protein |
| Cluster-2.24197 | 4,245  | Component of the replication protein A complex (RPA)   |
| Cluster-2.22983 | 4,196  | Belongs to the globin family                           |
| Cluster-2.24546 | 3,886  | Predicted NCR peptide (crp1450_Cluster-2.24546_0M_1)   |
| Cluster-2.19511 | 3,344  | None                                                   |
| Cluster-2.26207 | 3,296  | Extensin-like_protein_repeat                           |
| Cluster-2.49512 | 3,173  | Putative Blue (type 1) copper binding protein          |
| Cluster-2.21810 | 3,050  | Predicted NCR peptide (crp1160_Cluster-2.21810_0M_1)   |
| Cluster-2.22936 | 3,014  | Belongs to the globin family                           |
| Cluster-2.29430 | 2,789  | Putative Late nodulin                                  |
| Cluster-2.22881 | 2,788  | Predicted NCR peptide (crp1430_Cluster-2.22881_0M_1)   |
| Cluster-2.22836 | 2,509  | None                                                   |
| Cluster-2.23729 | 2,271  | hypothetical protein                                   |
| Cluster-2.22458 | 2,245  | Belongs to the globin family                           |
| Cluster-2.24829 | 2,227  | hypothetical protein                                   |
| Cluster-2.25168 | 2,209  | None                                                   |
| Cluster-2.24278 | 2,093  | Nodule-specific_GRP_repeat                             |
| Cluster-2.23928 | 2,038  | Late_nodulin_protein                                   |
| Cluster-2.22042 | 2,029  | None                                                   |
| Cluster-2.23245 | 2,019  | Putative translationally controlled tumor protein      |
| Cluster-2.25794 | 2,018  | Putative protein-synthesizing GTPase                   |
| Cluster-2.31376 | 1,957  | Predicted NCR peptide (crp1190_Cluster-2.31376_0M_1)   |
| Cluster-2.21809 | 1,939  | Predicted NCR peptide (crp1160_Cluster-2.21809_0M_1)   |
| Cluster-2.28083 | 1,854  | Predicted NCR peptide (crp1210_Cluster-2.28083_0M_1)   |
| Cluster-2.23524 | 1,844  | Early nodulin-16                                       |
| Cluster-2.34649 | 1,839  | Putative Late nodulin                                  |
| Cluster-2.16993 | 1,808  | hypothetical protein                                   |
| Cluster-2.21813 | 1,731  | None                                                   |
| Cluster-2.22457 | 1,705  | Belongs to the globin family                           |
| Cluster-2.28283 | 1,674  | None                                                   |
| Cluster-2.26205 | 1,621  | Predicted NCR peptide (crp1240_Cluster-2.26205_0M_1)   |
| Cluster-2.23310 | 1,607  | asparagine synthetase                                  |
| Cluster-2.21870 | 1,596  | Nodule-specific_GRP_repeat                             |
| Cluster-2.19604 | 1,583  | Predicted NCR peptide (crp1420_Cluster-2.19604_0M_1)   |
| Cluster-2.18485 | 1,509  | hypothetical protein                                   |
| Cluster-2.26876 | 1,458  | Predicted NCR peptide (crp1410_Cluster-2.26876_0M_1)   |
| Cluster-2.21536 | 1,441  | Ubiquitin_family                                       |
| Cluster-2.22785 | 1,408  | None                                                   |
| Cluster-2.23374 | 1,385  | Predicted NCR peptide (crp1420_Cluster-2.23374_0M_1)   |
| Cluster-2.28787 | 1,311  | Putative Late nodulin                                  |
| Cluster-2.22402 | 1,292  | Predicted NCR peptide (crp1520_Cluster-2.22402_0M_1)   |
| Cluster-2.30081 | 1,289  | Late nodulin protein                                   |

337

338 **Table 3.** The 50 most highly abundant transcripts in the *M. officinalis* nodule transcriptome, with  
 339 the average expression level in transcripts per million (TPM) and the functional annotation.

| Gene ID            | TPM    | Functional Prediction                                                                           |
|--------------------|--------|-------------------------------------------------------------------------------------------------|
| Cluster-3554.18801 | 38,953 | Belongs to the globin family                                                                    |
| Cluster-3554.18778 | 14,091 | Belongs to the globin family                                                                    |
| Cluster-3554.16063 | 10,412 | Late_nodulin_protein                                                                            |
| Cluster-3554.15387 | 7,885  | Putative Late nodulin                                                                           |
| Cluster-3554.16088 | 6,146  | Putative Late nodulin                                                                           |
| Cluster-3554.18892 | 6,104  | None                                                                                            |
| Cluster-3554.15771 | 5,813  | Late_nodulin_protein                                                                            |
| Cluster-3554.18802 | 5,362  | Belongs to the globin family                                                                    |
| Cluster-3554.18596 | 5,347  | Predicted NCR peptide (crp1430_Cluster-3554.18596_0M_1)                                         |
| Cluster-3554.15456 | 3,912  | Putative translationally controlled tumor protein                                               |
| Cluster-3554.18808 | 3,864  | Belongs to the globin family                                                                    |
| Cluster-3554.33215 | 3,302  | hypothetical protein                                                                            |
| Cluster-3554.18775 | 3,097  | Putative Late nodulin                                                                           |
| Cluster-3554.23000 | 2,990  | Two predicted NCR peptide (crp1180_Cluster-3554.23000_0M_1 and crp1180_Cluster-3554.23000_0M_2) |
| Cluster-3554.36681 | 2,877  | Predicted NCR peptide (crp1500_Cluster-3554.36681_0M_1)                                         |
| Cluster-3554.21555 | 2,868  | Predicted NCR peptide (crp1430_Cluster-3554.21555_0M_1)                                         |
| Cluster-3554.16074 | 2,809  | Putative BURP domain-containing protein                                                         |
| Cluster-3554.29297 | 2,784  | hypothetical protein                                                                            |
| Cluster-3554.18196 | 2,723  | None                                                                                            |
| Cluster-3554.18256 | 2,571  | Predicted NCR peptide (crp1440_Cluster-3554.18256_0M_1)                                         |
| Cluster-3554.27063 | 2,522  | None                                                                                            |
| Cluster-3554.22577 | 2,449  | Putative Blue (type 1) copper binding protein                                                   |
| Cluster-3554.15361 | 2,409  | eEF1A                                                                                           |
| Cluster-3554.21311 | 2,384  | Belongs to the globin family                                                                    |
| Cluster-3554.18838 | 2,340  | Late_nodulin_protein                                                                            |
| Cluster-3554.18700 | 2,296  | Late_nodulin_protein                                                                            |
| Cluster-3554.11713 | 2,261  | None                                                                                            |
| Cluster-3554.18706 | 2,259  | None                                                                                            |
| Cluster-3554.23445 | 2,214  | None                                                                                            |
| Cluster-3554.17366 | 2,141  | Predicted NCR peptide (crp1430_Cluster-3554.17366_0M_1)                                         |
| Cluster-3554.23502 | 2,073  | hypothetical protein                                                                            |
| Cluster-3554.25153 | 2,009  | Metallothionein-like protein 2                                                                  |
| Cluster-3554.21451 | 1,953  | Belongs to the globin family                                                                    |
| Cluster-3554.28600 | 1,931  | hypothetical protein                                                                            |
| Cluster-3554.22971 | 1,849  | hypothetical protein                                                                            |
| Cluster-3554.18877 | 1,812  | Belongs to the glyceraldehyde-3-phosphate dehydrogenase family                                  |
| Cluster-3554.13172 | 1,732  | Predicted NCR peptide (crp1440_Cluster-3554.13172_0M_1)                                         |
| Cluster-3554.18195 | 1,704  | Zinc_knuckle                                                                                    |
| Cluster-3554.30751 | 1,653  | Putative Late nodulin                                                                           |
| Cluster-3554.21774 | 1,635  | Late_nodulin_protein                                                                            |
| Cluster-3554.13784 | 1,629  | Predicted NCR peptide (crp1420_Cluster-3554.13784_0M_1)                                         |
| Cluster-3554.24033 | 1,611  | Prolyl isomerase (PPIase)                                                                       |
| Cluster-3554.30294 | 1,556  | metallothionein-like protein                                                                    |
| Cluster-3554.24764 | 1,552  | None                                                                                            |
| Cluster-3554.18368 | 1,552  | Nucleoside diphosphate kinase 1                                                                 |
| Cluster-3554.25344 | 1,537  | Metallothionein-like protein 1                                                                  |
| Cluster-3554.23646 | 1,514  | None                                                                                            |
| Cluster-3554.9874  | 1,512  | Belongs to the universal ribosomal protein uL13 family                                          |
| Cluster-3554.18476 | 1,503  | Late_nodulin_protein                                                                            |
| Cluster-3554.31722 | 1,476  | Putative Late nodulin                                                                           |

340

341 **Figure 3. Transcript abundances for conserved**  
342 **and species-specific transcripts.** Box plots  
343 displaying the distribution of average transcript  
344 abundances from triplicate samples, shown  
345 separately for genes with orthologs in both *M.*  
346 *sativa* and *M. officinalis* (orange), annotated  
347 transcripts found in only *M. sativa* or *M. officinalis*  
348 (blue), or transcripts that lack annotations and are  
349 found in only *M. sativa* or *M. officinalis* (green).  
350 Statistically significant differences between the  
351 distributions of a species are indicated with the  
352 asterisks ( $p$ -value  $< 1e^{-10}$ ; pairwise Wilcox tests).

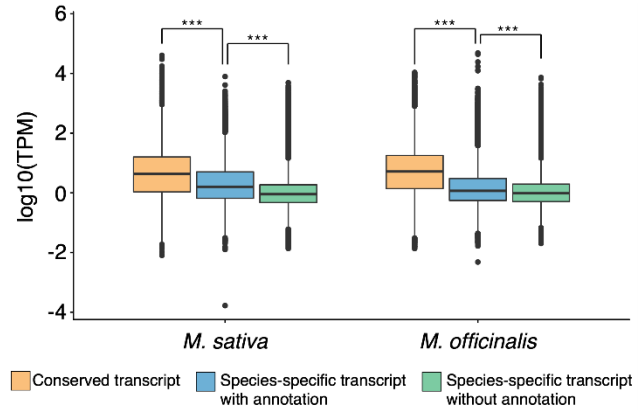

353  
354

355 We next compared the abundances of supertranscripts conserved in both *M. sativa* and *M.*  
356 *officinalis*, limiting the analysis to the 15,287 one-to-one orthologs detected by OrthoFinder.  
357 Despite significant variation in the abundance of orthologous transcripts between *M. sativa* and  
358 *M. officinalis* – which may reflect limitations of inter-species transcriptome analysis – a clear  
359 correlation in the abundance of orthologous transcripts was detected (residual standard error =  
360 0.517; **Figure 4**). Considering the limitations of inter-species differential expression analyses, we  
361 restricted our investigation to supertranscripts with absolute log<sub>2</sub> fold changes  $> 5$  and a  $p$ -value  $<$   
362 0.05. Using these thresholds, we identified 290 differentially-abundant transcripts, 86 of which  
363 were more abundant in *M. sativa*, and 204 of which were more abundant in *M. officinalis*. It should  
364 be noted, however, that only 159 of the differentially-abundant transcripts were annotated with the  
365 same or similar function in both species, and we focus on these 159 transcripts in the following  
366 discussion.

367  
368  
369

370 **Figure 4. Correlation between transcript**  
371 **abundances of orthologous transcripts in**  
372 ***M. sativa* and *M. officinalis*.** Each datapoint  
373 represents the transcript abundance of single-copy  
374 orthologous transcripts in *M. sativa* and *M.*  
375 *officinalis*. Red datapoints represent transcripts  
376 that are differentially abundant between the two  
377 species ( $|\log_2(\text{fold change})| > 5$ , adjusted  $p$ -value  $<$   
378 0.01); all other datapoints are in grey. The blue line  
379 represents the robust linear regression line,  
380 calculated with the rlm function of the MASS  
381 package in R.

382  
383  
384

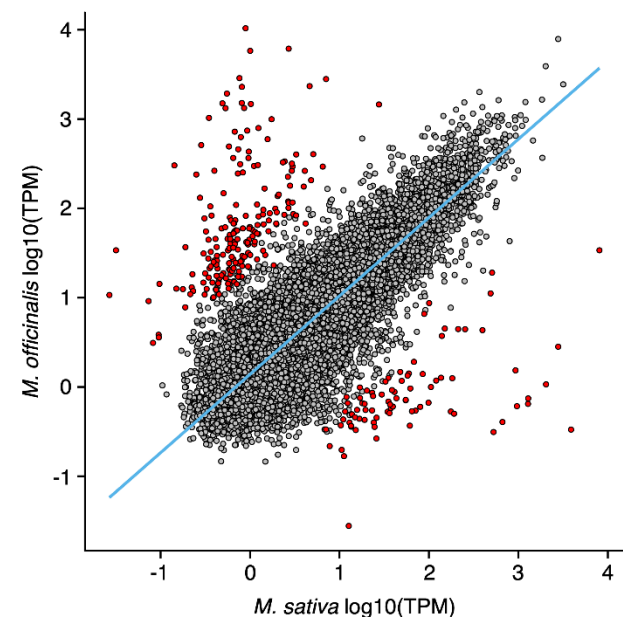

385 Many of the differentially-abundant conserved supertranscripts have annotated functions  
386 that suggest the encoded proteins may impact symbiotic nitrogen fixation. These include 21  
387 supertranscripts annotated as encoding nodulins, which include 16 that are more abundant in *M.*  
388 *officinalis* and 5 that are more abundant in *M. sativa*. In addition, 32 supertranscripts encoding  
389 proteins predicted to be associated with transcription and translation activity were differentially  
390 abundant, with 24 more abundant in *M. sativa* and eight more abundant in *M. officinalis*. We also  
391 observed that several supertranscripts encoding proteins predicted to be involved in cell wall  
392 synthesis or modification were differentially abundant, with six more highly abundant in *M. sativa*  
393 and one more highly abundant in *M. officinalis*. Other differentially-abundant transcripts included  
394 those predicted to encode proteins involved in transport (17 transcripts), fatty acid biosynthesis (3  
395 transcripts), flavonoid biosynthesis (3 transcripts), and aromatic compound biosynthesis (1  
396 transcript). Given that this analysis compares two plant species with differing growth rates (**Table**  
397 **S2**), we cannot rule out that some of these transcriptomic differences may also reflect variances in  
398 nodule maturity and/or host metabolic activity at the time of harvest.

399

#### 400 **NCR peptide diversity and expression profile**

401 We previously observed that replacing the *bacA* allele of *S. meliloti* 2011 with the *bacA* alleles of  
402 the rhizobia *S. fredii* NGR234 or *R. leguminosarum* bv. *viciae* 3841 resulted in an inability to fix  
403 nitrogen with *M. sativa* while the ability to fix nitrogen with *M. alba* and *M. officinalis* remained  
404 ((24) and **Table S1**). We hypothesized that this was due to differences in the NCR peptide profiles  
405 of these species (24). To test this hypothesis, supertranscripts encoding NCR peptides were  
406 identified in the *M. sativa* and *M. officinalis* transcriptome assemblies using the SPADA pipeline  
407 (62). A total of 412 and 308 supertranscripts encoding NCR peptides were identified in the *M.*  
408 *sativa* and *M. officinalis* transcriptomes, respectively, accounting for ~0.5% of all supertranscripts  
409 in both assemblies (**Datasets S5 and S6**). The lower count of *NCR* transcripts in *M. officinalis* was  
410 offset by a higher median transcript abundance (58.6 transcripts per million [TPM] vs 99.1 TPM;  
411  $p < 0.001$ ; **Figure 5A**), resulting in *NCR* transcripts accounting for roughly 9% of the total nodule  
412 transcriptome in both species. In both *M. sativa* and *M. officinalis*, *NCR* peptides had median  
413 lengths of 38 residues, with approximately half of the *NCR* peptides containing between 30 and  
414 40 residues (**Figure 5B**). Additionally, there was a roughly even number of four and six-cysteine  
415 *NCR* peptides expressed in both plant species, with the four-cysteine class of *NCR* peptides  
416 accounting for 51-55% of the *NCR* transcripts both in terms of number of *NCR* peptides and  
417 expression of *NCR* transcripts as measured by TPM. The *NCR* peptides from both hosts also  
418 showed broadly similar distributions of pI values between approximately 3 to 11, with one peak  
419 around a pI of 4 and another around pI 8 (**Figures 5C and 5D**). The pI pattern of the *NCR* peptides  
420 we observed is reminiscent of that reported for other legume species that induce an elongated  
421 branched morphology in their microsymbiont, including *M. sativa* and *M. truncatula* (86). Overall,  
422 at a global level, the property profiles of *NCR* peptides for *M. sativa* and *M. officinalis* were very  
423 similar, suggesting that the impact of different *bacA* alleles on symbiotic compatibility of *S.*  
424 *meliloti* with *M. sativa* is unlikely a consequence of global differences in the *NCR* peptide profiles

425 of these plants and is more likely due to specific NCR peptides. Identifying which NCR peptides  
 426 functionally correlate with symbiotic compatibility should be the focus of future studies.  
 427

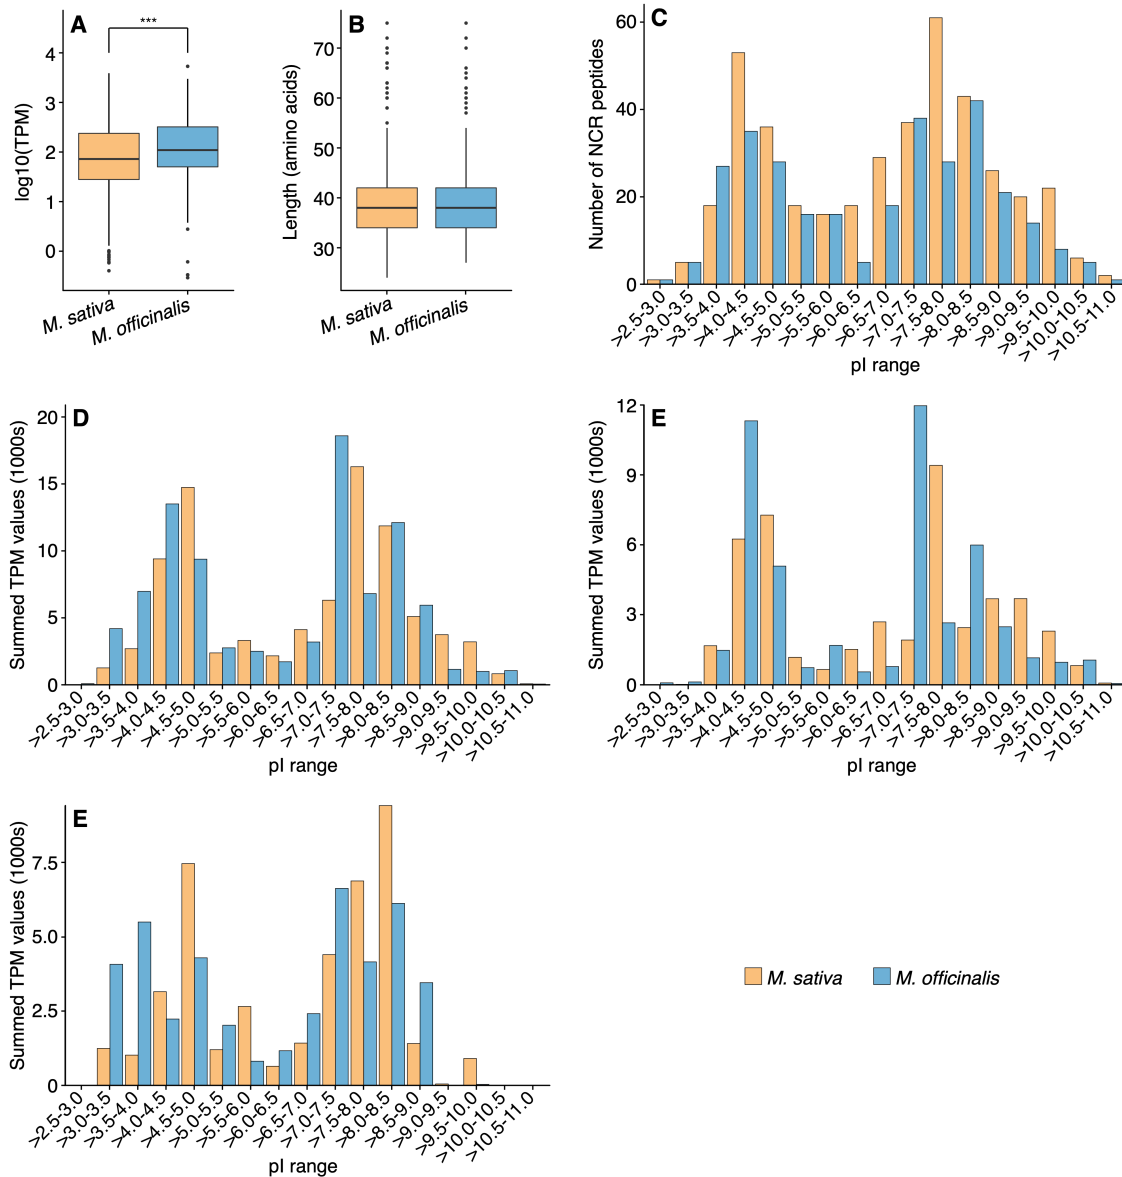

428  
 429 **Figure 5. NCR peptide profiles of *Medicago sativa* and *Melilotus officinalis*.** NCR peptides were  
 430 predicted from the *M. sativa* (orange) and *M. officinalis* (blue) transcriptome assemblies, and the properties  
 431 of the NCR peptides are shown in these graphs. (A) Box plots showing the distribution of the abundance  
 432 (in transcripts per million, TPM) of NCR transcripts, based on triplicate samples. The difference in the  
 433 distributions for the two species was statistically significant ( $p$ -value < 0.001; pairwise Wilcoxon test). (B)  
 434 Box plots showing the distribution of the amino acid lengths of mature NCR peptides. No statistically  
 435 significant difference in the distributions for the two species was detected. (C,D) Histograms showing the  
 436 distributions of the isoelectric points (pI) for the mature NCR peptides. Histograms are based either on the  
 437 number of NCR peptides with a given pI value (C) or the total abundance of the transcripts encoding NCR  
 438 peptides with a given pI value (D). (E,F) Histograms showing distributions of pI for 4-cysteines (E) and 6-  
 439 cysteines (F) mature NCR peptides based on total abundance of the transcripts encoding NCR peptides with  
 440 a given pI value.

441 Despite the general similarity in the NCR peptide profiles of *M. sativa* and *M. officinalis*,  
442 a key difference emerges when examining the abundance of NCR peptides with extreme pI values;  
443 transcripts encoding highly cationic NCR peptides were more abundant in *M. sativa* while  
444 transcripts encoding highly anionic NCR peptides were more abundant in *M. officinalis* (**Figure**  
445 **5D**). Previous work has shown that, in general, only cationic NCR peptides with a pI > 9.0 have  
446 antimicrobial activity (87), with anticandidal activity primarily limited to NCR peptides with a pI  
447 > 9.5 (88). Here, we observed that transcripts encoding highly cationic NCR peptides (pI > 9.0)  
448 were ~2.4-fold more abundant in *M. sativa* than *M. officinalis* (**Figure 5D**). Similarly, transcripts  
449 encoding NCR peptides with pI values > 9.5 were ~1.9-fold more abundant in *M. sativa* than *M.*  
450 *officinalis*. Notably, previous work indicated that 4.0% of *M. truncatula* NCR transcripts encode  
451 NCR peptides with pI values > 9.5, compared to only 1.8% in the *R. leguminosarum* bv. *viciae*  
452 symbiont *P. sativum* (86); this compares to 4.7% and 2.3% for *M. sativa* and *M. officinalis*,  
453 respectively (**Figure 5C**). Strikingly, when subdividing the NCR peptides with pI values > 9.5 into  
454 those with four or six cysteine residues, we observed that those with six-cysteines were ~27-fold  
455 more abundant in *M. sativa* than *M. officinalis* (**Figure 4E and 4F**). Considering these results, we  
456 hypothesize that the ability of the *R. leguminosarum* *bacA* allele to support symbiosis with *M.*  
457 *officinalis* and *P. sativum*, but not *M. sativa*, is a consequence of the elevated abundance of highly  
458 cationic (pI > 9.5) NCR peptides in *Medicago* nodules, with six-cysteine NCR peptides possibly  
459 being of particular significance. It may be that the BacA proteins of *S. fredii* and *R. leguminosarum*  
460 are less capable of transporting these NCR peptides, and consequently, strains with these BacA  
461 proteins may be more sensitive to the antimicrobial activities of these cationic NCR peptides.

462

463

464

## CONCLUSION

465 We report high quality nodule transcriptome assemblies for *M. sativa* cv. Algonquin and *M.*  
466 *officinalis* that we expect will serve as valuable resources for the legume research community. In  
467 particular, we expect that the availability of a nodule transcriptome for *M. officinalis* will help  
468 establish this plant as a secondary model system for studies of the symbiotic properties of *S.*  
469 *meliloti*.

470 We were particularly interested in using these transcriptomes to compare the properties of  
471 the NCR peptides encoded by both species. Despite predicting 33% more NCR peptides in *M.*  
472 *sativa* than *M. officinalis*, NCR transcripts accounted for roughly 9% of the transcriptome (based  
473 on TPM values) in both species. In general, the characteristics of the NCR peptides of *M. sativa*  
474 and *M. officinalis* were highly similar. However, transcripts encoding cationic NCR peptides with  
475 a pI > 9.5 were ~2-fold more abundant in *M. sativa* than in *M. officinalis*, and 27-fold more  
476 abundant when considering only six-cysteine NCR peptides. These results are consistent with  
477 previous observations that transcripts encoding cationic NCR peptides with a pI > 9.5 account for  
478 ~2-fold more NCR transcripts in *M. truncatula* compared to *P. sativum*. Cationic, but not neutral  
479 or anionic, NCR peptides display antimicrobial activity through disrupting the integrity of  
480 microbial membranes (89). It has been hypothesized that BacA provides protection against these



481 NCR peptides by importing them into the cytoplasm and thus away from the membrane (90, 91).  
482 Considering that the BacA proteins of *S. fredii* and *R. leguminosarum* share less than 60% amino  
483 acid identity with the BacA protein of *S. meliloti*, it is reasonable to speculate that they have  
484 different substrate specificity and may be less capable of transporting cationic NCR peptides (24).  
485 If true, this could explain why the *bacA* alleles of *S. fredii* and *R. leguminosarum* can support  
486 symbiotic nitrogen fixation with *M. officinalis* but not *M. sativa*; the increased production of  
487 cationic NCR peptides in *M. sativa*, coupled with lower rates of import into the *S. meliloti*  
488 cytoplasm, could result in an accumulation of these peptides in the periplasm, resulting in a loss  
489 of viability and lack of nitrogen fixation (24). In future work, it will be interesting to test whether  
490 *S. meliloti* strains with different *bacA* alleles display differing sensitivities to these highly cationic  
491 NCR peptides, or differences in their abilities to transport these peptides.

492  
493

#### 494 ACKNOWLEDGEMENTS

495 We thank Karen Ho and Neda Moradin from The Centre for Applied Genomics (Toronto, Canada)  
496 for helpful advice in planning the RNA-seq library preparation strategy. This research was enabled,  
497 in part, through computational resources provided by Compute Ontario ([computeontario.ca](http://computeontario.ca)) and  
498 Compute Canada ([computecanada.ca](http://computecanada.ca)). Funding for this research was provided by the Natural  
499 Sciences and Engineering Research Council of Canada (NSERC) through Discovery Grants to  
500 WAS and GCD.

501  
502

#### 503 CONFLICT OF INTEREST STATEMENT

504 The authors declare that they have no conflict of interest.

505  
506

#### 507 REFERENCES

- 508 1. Oldroyd GED. 2013. Speak, friend, and enter: signaling systems that promote beneficial  
509 symbiotic associations in plants. *Nat Rev Microbiol* 11:252–263.
- 510 2. Gage DJ. 2004. Infection and invasion of roots by symbiotic, nitrogen-fixing rhizobia  
511 during nodulation of temperate legumes. *Microbiol Mol Biol Rev* 68:280–300.
- 512 3. Van de Velde W, Zehirov G, Szatmari A, Debreczeny M, Ishihara H, Kevei Z, Farkas A,  
513 Mikulass K, Nagy A, Tiricz H. 2010. Plant peptides govern terminal differentiation of  
514 bacteria in symbiosis. *Science* (80- ) 327:1122–1126.
- 515 4. Mergaert P, Uchiumi T, Alunni B, Evanno G, Cheron A, Catrice O, Mausset A-E, Barloy-  
516 Hubler F, Galibert F, Kondorosi A. 2006. Eukaryotic control on bacterial cell cycle and  
517 differentiation in the *Rhizobium*–legume symbiosis. *Proc Natl Acad Sci U S A* 103:5230–  
518 5235.
- 519 5. Lamouche F, Bonadé-Bottino N, Mergaert P, Alunni B. 2019. Symbiotic efficiency of

- 520 spherical and elongated bacteroids in the *Aeschynomene-Bradyrhizobium* symbiosis. Front  
521 Plant Sci 10:377.
- 522 6. Haag AF, Mergaert P. December 2019, 13<sup>th</sup>. Chapter 9.2.2, Terminal bacteroid  
523 differentiation in the *Medicago-Rhizobium* interaction—a tug of war between plant and  
524 bacteria. F. de Bruijn (Ed.), Model Legume *Medicago truncatula*. John Wiley & Sons, Inc.,  
525 New York, NY <https://doi.org/10.1002/9781119409144.ch75>
- 526 7. Wilson JK. 1939. Leguminous plants and their associated organisms. Mem Cornell univ  
527 Exp Sta 221.
- 528 8. Pueppke SG, Broughton WJ. 1999. *Rhizobium* sp. strain NGR234 and *R. fredii* USDA257  
529 share exceptionally broad, nested host ranges. Mol Plant-Microbe Interact 12:293–318.
- 530 9. Walker L, Lagunas B, Gifford ML. 2020. Determinants of Host Range Specificity in  
531 Legume-Rhizobia Symbiosis. Front Microbiol 11:85749.
- 532 10. Maxwell CA, Hartwig UA, Joseph CM, Phillips DA. 1989. A chalcone and two related  
533 flavonoids released from alfalfa roots induce *nod* genes of *Rhizobium meliloti*. Plant Physiol  
534 91:842–847.
- 535 11. Recourt K, Schripsema J, Kijne JW, van Brussel AAN, Lugtenberg BJJ. 1991. Inoculation  
536 of *Vicia sativa* subsp. *nigra* roots with *Rhizobium leguminosarum* biovar *viciae* results in  
537 release of *nod* gene activating flavanones and chalcones. Plant Mol Biol 16:841–852.
- 538 12. Kosslak RM, Bookland R, Barkei J, Paaren HE, Appelbaum ER. 1987. Induction of  
539 *Bradyrhizobium japonicum* common *nod* genes by isoflavones isolated from Glycine max.  
540 Proc Natl Acad Sci U S A 84:7428–7432.
- 541 13. Pueppke SG, Bolanos-Vásquez MC, Werner D, Bec-Ferté M-P, Promé J-C, Krishnan HB.  
542 1998. Release of flavonoids by the soybean cultivars McCall and Peking and their  
543 perception as signals by the nitrogen-fixing symbiont *Sinorhizobium fredii*. Plant Physiol  
544 117:599–606.
- 545 14. D’Haeze W, Holsters M. 2002. Nod factor structures, responses, and perception during  
546 initiation of nodule development. Glycobiology 12:79R-105R.
- 547 15. Finan TM, Hirsch AM, Leigh JA, Johansen E, Kuldau GA, Deegan S, Walker GC, Signer  
548 ER. 1985. Symbiotic mutants of *Rhizobium meliloti* that uncouple plant from bacterial  
549 differentiation. Cell 40:869–877.
- 550 16. Leigh JA, Signer ER, Walker GC. 1985. Exopolysaccharide-deficient mutants of *Rhizobium*  
551 *meliloti* that form ineffective nodules. Proc Natl Acad Sci U S A 82:6231 LP – 6235.
- 552 17. Simsek S, Ojanen-Reuhs T, Stephens SB, Reuhs BL. 2007. Strain-ecotype specificity in  
553 *Sinorhizobium meliloti-Medicago truncatula* symbiosis is correlated to succinoglycan  
554 oligosaccharide structure. J Bacteriol 189:7733–7740.
- 555 18. Yang S, Tang F, Gao M, Krishnan HB, Zhu H. 2010. *R* gene-controlled host specificity in

- 556 the legume–rhizobia symbiosis. *Proc Natl Acad Sci U S A* 107:18735–18740.
- 557 19. Tsukui T, Eda S, Kaneko T, Sato S, Okazaki S, Kakizaki-Chiba K, Itakura M, Mitsui H,  
558 Yamashita A, Terasawa K. 2013. The type III secretion system of *Bradyrhizobium*  
559 *japonicum* USDA122 mediates symbiotic incompatibility with *Rj2* soybean plants. *Appl*  
560 *Environ Microbiol* 79:1048–1051.
- 561 20. Tsurumaru H, Hashimoto S, Okizaki K, Kanesaki Y, Yoshikawa H, Yamakawa T. 2015. A  
562 putative type III secretion system effector encoded by the *MA20\_12780* gene in  
563 *Bradyrhizobium japonicum* Is-34 causes incompatibility with *Rj4* genotype soybeans. *Appl*  
564 *Environ Microbiol* 81:5812–5819.
- 565 21. Yang S, Wang Q, Fedorova E, Liu J, Qin Q, Zheng Q, Price PA, Pan H, Wang D, Griffitts  
566 JS. 2017. Microsymbiont discrimination mediated by a host-secreted peptide in *Medicago*  
567 *truncatula*. *Proc Natl Acad Sci U S A* 114:6848–6853.
- 568 22. Wang Q, Yang S, Liu J, Terecskei K, Ábrahám E, Gombár A, Domonkos Á, Szűcs A,  
569 Körmöczi P, Wang T. 2017. Host-secreted antimicrobial peptide enforces symbiotic  
570 selectivity in *Medicago truncatula*. *Proc Natl Acad Sci U S A* 114:6854–6859.
- 571 23. Wang Q, Liu J, Li H, Yang S, Körmöczi P, Kereszt A, Zhu H. 2018. Nodule-specific  
572 cysteine-rich peptides negatively regulate nitrogen-fixing symbiosis in a strain-specific  
573 manner in *Medicago truncatula*. *Mol Plant-Microbe Interact* 31:240–248.
- 574 24. diCenzo GC, Zamani M, Ludwig HN, Finan TM. 2017. Heterologous complementation  
575 reveals a specialized activity for BacA in the *Medicago–Sinorhizobium meliloti* symbiosis.  
576 *Mol Plant-Microbe Interact* 30:312–324.
- 577 25. Young ND, Debellé F, Oldroyd GED, Geurts R, Cannon SB, Udvardi MK, Benedito VA,  
578 Mayer KFX, Gouzy J, Schoof H. 2011. The *Medicago* genome provides insight into the  
579 evolution of rhizobial symbioses. *Nature* 480:520–524.
- 580 26. Mergaert P, Nikovics K, Kelemen Z, Maunoury N, Vaubert D, Kondorosi A, Kondorosi E.  
581 2003. A novel family in *Medicago truncatula* consisting of more than 300 nodule-specific  
582 genes coding for small, secreted polypeptides with conserved cysteine motifs. *Plant Physiol*  
583 132:161–173.
- 584 27. Maróti G, Downie JA, Kondorosi É. 2015. Plant cysteine-rich peptides that inhibit pathogen  
585 growth and control rhizobial differentiation in legume nodules. *Curr Opin Plant Biol* 26:57–  
586 63.
- 587 28. Maróti G, Kereszt A, Kondorosi E, Mergaert P. 2011. Natural roles of antimicrobial  
588 peptides in microbes, plants and animals. *Res Microbiol* 162:363–374.
- 589 29. Tiricz H, Szűcs A, Farkas A, Pap B, Lima RM, Maróti G, Kondorosi É, Kereszt A. 2013.  
590 Antimicrobial nodule-specific cysteine-rich peptides induce membrane depolarization-  
591 associated changes in the transcriptome of *Sinorhizobium meliloti*. *Appl Environ Microbiol*

- 592 79:6737–6746.
- 593 30. Horváth B, Domonkos Á, Kereszt A, Szűcs A, Ábrahám E, Ayaydin F, Bóka K, Chen Y,  
594 Chen R, Murray JD. 2015. Loss of the nodule-specific cysteine rich peptide, NCR169,  
595 abolishes symbiotic nitrogen fixation in the *Medicago truncatula dnf7* mutant. Proc Natl  
596 Acad Sci U S A 112:15232–15237.
- 597 31. Kim M, Chen Y, Xi J, Waters C, Chen R, Wang D. 2015. An antimicrobial peptide essential  
598 for bacterial survival in the nitrogen-fixing symbiosis. Proc Natl Acad Sci U S A  
599 112:15238–15243.
- 600 32. Glazebrook J, Ichige A, Walker GC. 1993. A *Rhizobium meliloti* homolog of the  
601 *Escherichia coli* peptide-antibiotic transport protein SbmA is essential for bacteroid  
602 development. Genes Dev 7:1485–1497.
- 603 33. Marlow VL, Haag AF, Kobayashi H, Fletcher V, Scocchi M, Walker GC, Ferguson GP.  
604 2009. Essential role for the BacA protein in the uptake of a truncated eukaryotic peptide in  
605 *Sinorhizobium meliloti*. J Bacteriol 191:1519–1527.
- 606 34. Haag AF, Baloban M, Sani M, Kerscher B, Pierre O, Farkas A, Longhi R, Boncompagni E,  
607 Hérouart D, Dall’Angelo S. 2011. Protection of *Sinorhizobium* against host cysteine-rich  
608 antimicrobial peptides is critical for symbiosis. PLoS Biol 9:e1001169.
- 609 35. Guefrachi I, Pierre O, Timchenko T, Alunni B, Barriere Q, Czernic P, Villaécija-Aguilar J-  
610 A, Verly C, Bourge M, Fardoux J. 2015. *Bradyrhizobium* BclA is a peptide transporter  
611 required for bacterial differentiation in symbiosis with *Aeschynomene* legumes. Mol Plant-  
612 Microbe Interact 28:1155–1166.
- 613 36. Barrière Q, Guefrachi I, Gully D, Lamouche F, Pierre O, Fardoux J, Chaintreuil C, Alunni  
614 B, Timchenko T, Giraud E. 2017. Integrated roles of BclA and DD-carboxypeptidase 1 in  
615 *Bradyrhizobium* differentiation within NCR-producing and NCR-lacking root nodules. Sci  
616 Rep 7:1–13.
- 617 37. Maruya J, Saeki K. 2010. The *bacA* gene homolog, mlr7400, in *Mesorhizobium loti*  
618 MAFF303099 is dispensable for symbiosis with *Lotus japonicus* but partially capable of  
619 supporting the symbiotic function of *bacA* in *Sinorhizobium meliloti*. Plant Cell Physiol  
620 51:1443–1452.
- 621 38. Honma MA, Ausubel FM. 1987. *Rhizobium meliloti* has three functional copies of the *nodD*  
622 symbiotic regulatory gene. Proc Natl Acad Sci U S A 84:8558–8562.
- 623 39. Zamani M, Cowie A, Finan TM. 2015. Proline auxotrophy in *Sinorhizobium meliloti* results  
624 in a plant-specific symbiotic phenotype. Microbiology 161:2341–2351.
- 625 40. Zamani M, diCenzo GC, Milunovic B, Finan TM. 2017. A putative 3-hydroxyisobutyryl-  
626 CoA hydrolase is required for efficient symbiotic nitrogen fixation in *Sinorhizobium*  
627 *meliloti* and *Sinorhizobium fredii* NGR234. Environ Microbiol 19:218–236.

- 628 41. Geddes BA, Kearsley JVS, Huang J, Zamani M, Muhammed Z, Sather L, Panchal AK,  
629 Finan TM. 2021. Minimal gene set from *Sinorhizobium (Ensifer) meliloti* pSymA required  
630 for efficient symbiosis with *Medicago*. Proc Natl Acad Sci U S A 118: e2018015118.
- 631 42. Jensen HL. 1942. Nitrogen fixation in leguminous plants. I. General characters of root-  
632 nodule bacteria isolated from species of *Medicago* and *Trifolium* in Australia, p. 98–108. In  
633 Proc. Linn. Soc. NSW.
- 634 43. Andrews S, Krueger F, Semonds-Pichon A, Biggins F, Wingett S. 2015. “FastQC. A quality  
635 control tool for high throughput sequence data. Babraham Bioinformatics”, Babraham  
636 Institute.
- 637 44. Song L, Florea L. 2015. Rcorrector: efficient and accurate error correction for Illumina  
638 RNA-seq reads. Gigascience 4:s13742-015.
- 639 45. Martin M. 2011. Cutadapt removes adapter sequences from high-throughput sequencing  
640 reads. EMBnet J 17:10–12.
- 641 46. Bolger AM, Lohse M, Usadel B. 2014. Trimmomatic: a flexible trimmer for Illumina  
642 sequence data. Bioinformatics 30:2114–2120.
- 643 47. Grabherr MG, Haas BJ, Yassour M, Levin JZ, Thompson DA, Amit I, Adiconis X, Fan L,  
644 Raychowdhury R, Zeng Q. 2011. Full-length transcriptome assembly from RNA-Seq data  
645 without a reference genome. Nat Biotechnol 29:644.
- 646 48. Davidson NM, Hawkins ADK, Oshlack A. 2017. SuperTranscripts: a data driven reference  
647 for analysis and visualisation of transcriptomes. Genome Biol 18:1–10.
- 648 49. Davidson NM, Oshlack A. 2014. Corset: enabling differential gene expression analysis for  
649 de novo assembled transcriptomes. Genome Biol 15:1–14.
- 650 50. Dobin A, Davis CA, Schlesinger F, Drenkow J, Zaleski C, Jha S, Batut P, Chaisson M,  
651 Gingeras TR. 2013. STAR: ultrafast universal RNA-seq aligner. Bioinformatics 29:15–21.
- 652 51. Seppey M, Manni M, Zdobnov EM. 2019. BUSCO: assessing genome assembly and  
653 annotation completeness, p. 227–245. In Gene prediction. Springer.
- 654 52. Sallet E, Roux B, Sauviac L, Jardinaud M-F, Carrère S, Faraut T, de Carvalho-Niebel F,  
655 Gouzy J, Gamas P, Capela D, Bruand C, Schiex T. 2013. Next-Generation Annotation of  
656 Prokaryotic Genomes with EuGene-P: Application to *Sinorhizobium meliloti* 2011. DNA  
657 Res 20:339–354.
- 658 53. Camacho C, Coulouris G, Avagyan V, Ma N, Papadopoulos J, Bealer K, Madden TL.  
659 2009. BLAST+: architecture and applications. BMC Bioinformatics 10:1–9.
- 660 54. Chen H, Zeng Y, Yang Y, Huang L, Tang B, Zhang H, Hao F, Liu W, Li Y, Liu Y, Zhang  
661 X, Zhang R, Zhang Y, Li Y, Wang K, He H, Wang Z, Fan G, Yang H, Bao A, Shang Z,  
662 Chen J, Wang W, Qiu Q. 2020. Allele-aware chromosome-level genome assembly and  
663 efficient transgene-free genome editing for the autotetraploid cultivated alfalfa. Nat

- 664 Commun 11:2494.
- 665 55. 2021. UniProt: The universal protein knowledgebase in 2021. *Nucleic Acids Res*  
666 49:D480–D489.
- 667 56. Pecrix Y, Staton SE, Sallet E, Lelandais-Brière C, Moreau S, Carrère S, Blein T,  
668 Jardinaud M-F, Latrasse D, Zouine M, Zahm M, Kreplak J, Mayjonade B, Satgé C, Perez  
669 M, Cauet S, Marande W, Chantry-Darmon C, Lopez-Roques C, Bouchez O, Bérard A,  
670 Debelle F, Muñoz S, Bendahmane A, Bergès H, Niebel A, Buitink J, Frugier F, Benhamed  
671 M, Crespi M, Gouzy J, Gamas P. 2018. Whole-genome landscape of *Medicago truncatula*  
672 symbiotic genes. *Nat Plants* 4:1017–1025.
- 673 57. Huerta-Cepas J, Szklarczyk D, Heller D, Hernández-Plaza A, Forslund SK, Cook H, Mende  
674 DR, Letunic I, Rattei T, Jensen LJ, Von Mering C, Bork P. 2019. EggNOG 5.0: A  
675 hierarchical, functionally and phylogenetically annotated orthology resource based on 5090  
676 organisms and 2502 viruses. *Nucleic Acids Res* 47:D309-D314.
- 677 58. Buchfink B, Xie C, Huson DH. 2015. Fast and sensitive protein alignment using  
678 DIAMOND. *Nat Methods* 12:59–60.
- 679 59. Eddy SR. 2011. Accelerated profile HMM searches. *PLoS Comput Biol* 7:e1002195.
- 680 60. Mistry J, Chuguransky S, Williams L, Qureshi M, Salazar GA, Sonnhammer ELL, Tosatto  
681 SCE, Paladin L, Raj S, Richardson LJ. 2021. Pfam: The protein families database in 2021.  
682 *Nucleic Acids Res* 49:D412–D419.
- 683 61. Haft DH, Selengut JD, Richter RA, Harkins D, Basu MK, Beck E. 2012. TIGRFAMs and  
684 genome properties in 2013. *Nucleic Acids Res* 41:D387–D395.
- 685 62. Zhou P, Silverstein KAT, Gao L, Walton JD, Nallu S, Guhlin J, Young ND. 2013. Detecting  
686 small plant peptides using SPADA (small peptide alignment discovery application). *BMC*  
687 *Bioinform* 14:1–16.
- 688 63. Stanke M, Schöffmann O, Morgenstern B, Waack S. 2006. Gene prediction in eukaryotes  
689 with a generalized hidden Markov model that uses hints from external sources. *BMC*  
690 *Bioinform* 7:1–11.
- 691 64. Birney E, Clamp M, Durbin R. 2004. GeneWise and genomewise. *Genome Res* 14:988–  
692 995.
- 693 65. Lukashin A V, Borodovsky M. 1998. GeneMark. hmm: new solutions for gene finding.  
694 *Nucleic Acids Res* 26:1107–1115.
- 695 66. Blanco E, Parra G, Guigó R. 2007. Using geneid to identify genes. *Curr Protoc Bioinform*  
696 18:3–4.
- 697 67. Sievers F, Wilm A, Dineen D, Gibson TJ, Karplus K, Li W, Lopez R, McWilliam H,  
698 Remmert M, Söding J. 2011. Fast, scalable generation of high-quality protein multiple  
699 sequence alignments using Clustal Omega. *Mol Syst Biol* 7:539.

- 700 68. Petersen TN, Brunak S, Von Heijne G, Nielsen H. 2011. SignalP 4.0: discriminating signal  
701 peptides from transmembrane regions. *Nat Methods* 8:785–786.
- 702 69. Audain E, Ramos Y, Hermjakob H, Flower DR, Perez-Riverol Y. 2016. Accurate estimation  
703 of isoelectric point of protein and peptide based on amino acid sequences. *Bioinformatics*  
704 32:821–827.
- 705 70. Patro R, Duggal G, Love MI, Irizarry RA, Kingsford C. 2017. Salmon provides fast and  
706 bias-aware quantification of transcript expression. *Nat Methods* 14:417–419.
- 707 71. Love M, Anders S, Huber W. 2014. Differential analysis of count data—the DESeq2  
708 package. *Genome Biol* 15:10–1186.
- 709 72. Emms DM, Kelly S. 2019. OrthoFinder: phylogenetic orthology inference for comparative  
710 genomics. *Genome Biol* 20:1–14.
- 711 73. Computing Rf. 2013. R: A language and environment for statistical computing. Vienna R  
712 Core Team.
- 713 74. Wang T-Z, Liu M, Zhao M-G, Chen R, Zhang W-H. 2015. Identification and  
714 characterization of long non-coding RNAs involved in osmotic and salt stress in *Medicago*  
715 *truncatula* using genome-wide high-throughput sequencing. *BMC Plant Biol* 15:131.
- 716 75. Kerr SC, Gaiti F, Beveridge CA, Tanurdzic M. 2017. *De novo* transcriptome assembly  
717 reveals high transcriptional complexity in *Pisum sativum* axillary buds and shows rapid  
718 changes in expression of diurnally regulated genes. *BMC Genomics* 18:221.
- 719 76. Zhang S, Shi Y, Cheng N, Du H, Fan W, Wang C. 2015. *De novo* characterization of fall  
720 dormant and nondormant alfalfa (*Medicago sativa* L.) leaf transcriptome and identification  
721 of candidate genes related to fall dormancy. *PLoS One* 10:e0122170.
- 722 77. Arshad M, Gruber MY, Hannoufa A. 2018. Transcriptome analysis of microRNA156  
723 overexpression alfalfa roots under drought stress. *Sci Rep* 8:1–13.
- 724 78. Al-Qurainy F, Alshameri A, Gaafar A-R, Khan S, Nadeem M, Alameri AA, Tarroum M,  
725 Ashraf M. 2019. Comprehensive stress-based *de novo* transcriptome assembly and  
726 annotation of guar (*Cyamopsis tetragonoloba* (L.) Taub.): an important industrial and forage  
727 crop. *Int J Genomics* 2019.
- 728 79. Weisberg AJ, Kim G, Westwood JH, Jelesko JG. 2017. Sequencing and *de novo* assembly  
729 of the *Toxicodendron radicans* (poison ivy) transcriptome. *Genes (Basel)* 8:317.
- 730 80. Malovichko Y V, Shtark OY, Vasileva EN, Nizhnikov AA, Antonets KS. 2020.  
731 Transcriptomic insights into mechanisms of early seed maturation in the garden pea (*Pisum*  
732 *sativum* L.). *Cells* 9:779.
- 733 81. Nash DT, Schulman HM. 1976. Leghemoglobins and nitrogenase activity during soybean  
734 root nodule development. *Can J Bot* 54:2790–2797.

- 735 82. Ott T, van Dongen JT, Gu C, Krusell L, Desbrosses G, Vigeolas H, Bock V, Czechowski  
736 T, Geigenberger P, Udvardi MK. 2005. Symbiotic leghemoglobins are crucial for nitrogen  
737 fixation in legume root nodules but not for general plant growth and development. *Curr Biol*  
738 15:531–535.
- 739 83. Rahioui I, Eyraud V, Karaki L, Sasse F, Carre-Pierrat M, Qin A, Zheng MH, Toepfer S,  
740 Sivignon C, Royer C. 2014. Host range of the potential biopesticide Pea Albumin 1b (PA1b)  
741 is limited to insects. *Toxicon* 89:67–76.
- 742 84. Limpens E, Moling S, Hooiveld G, Pereira PA, Bisseling T, Becker JD, Küster H. 2013.  
743 Cell-and tissue-specific transcriptome analyses of *Medicago truncatula* root nodules. *PLoS*  
744 *One* 8:e64377.
- 745 85. Karaki L, Da Silva P, Rizk F, Chouabe C, Chantret N, Eyraud V, Gressent F, Sivignon C,  
746 Rahioui I, Kahn D, Brochier-Armanet C, Rahbé Y, Royer C. 2016. Genome-wide analysis  
747 identifies gain and loss/change of function within the small multigenic insecticidal Albumin  
748 1 family of *Medicago truncatula*. *BMC Plant Biol* 16:63.
- 749 86. Montiel J, Downie JA, Farkas A, Bihari P, Herczeg R, Bálint B, Mergaert P, Kereszt A,  
750 Kondorosi É. 2017. Morphotype of bacteroids in different legumes correlates with the  
751 number and type of symbiotic NCR peptides. *Proc Natl Acad Sci U S A* 114:5041–5046.
- 752 87. Lima RM, Kylarová S, Mergaert P, Kondorosi É. 2020. Unexplored arsenals of legume  
753 peptides with potential for their applications in medicine and agriculture. *Front Microbiol*  
754 11:1307.
- 755 88. Ördögh L, Vörös A, Nagy I, Kondorosi É, Kereszt A. 2014. Symbiotic Plant Peptides  
756 Eliminate *Candida albicans* Both *In Vitro* and in an Epithelial Infection Model and Inhibit  
757 the Proliferation of Immortalized Human Cells. *Biomed Res Int* 2014:320796.
- 758 89. Mikuláss KR, Nagy K, Bogos B, Szegletes Z, Kovács E, Farkas A, Váró G, Kondorosi É,  
759 Kereszt A. 2016. Antimicrobial nodule-specific cysteine-rich peptides disturb the integrity  
760 of bacterial outer and inner membranes and cause loss of membrane potential. *Ann Clin*  
761 *Microbiol Antimicrob* 15:43.
- 762 90. Quentin N, Quentin B, Nicolas B, Sara D, Dmitrii T, Mickaël B, Romain LB, Claire B,  
763 Marie L, Sándor J, Atilla K, Eva K, G. BE, Tatiana T, Benoît A, Peter M, Joerg G. 2022.  
764 *Sinorhizobium meliloti* Functions Required for Resistance to Antimicrobial NCR Peptides  
765 and Bacteroid Differentiation. *mBio* 12:e00895-21.
- 766 91. F. AMF, Mohammed S, Jon P, L. BK, S. GJ, C. WG, M. AF, Peter M, Philip P. 2022.  
767 Genome-Wide Sensitivity Analysis of the Microsymbiont *Sinorhizobium meliloti* to  
768 Symbiotically Important, Defensin-Like Host Peptides. *mBio* 8:e01060-17.



769 **Table 1.** Summary statistics from the *de novo* Trinity and compressed (SuperTranscripts) nodule transcriptome assemblies.

|                                 | <i>M. sativa</i> |                  | <i>M. officinalis</i> |                  |
|---------------------------------|------------------|------------------|-----------------------|------------------|
|                                 | Trinity Assembly | SuperTranscripts | Trinity Assembly      | SuperTranscripts |
| Total number of contigs         | 253,871          | 79,978           | 192,165               | 64,593           |
| Total number of base pairs (bp) | 239,421,306      | 96,211,060       | 191,200,637           | 81,371,534       |
| Average contig length (bp)      | 943              | 1203             | 995                   | 1260             |
| Median contig length (bp)       | 618              | 734              | 646                   | 780              |
| Contig N50 (bp)                 | 1,466            | 1,912            | 1,584                 | 1968             |
| Minimum contig length (bp)      | 176              | 193              | 183                   | 198              |
| Maximum contig length (bp)      | 12,655           | 29,784           | 14,584                | 23,941           |
| Overall alignment rate (%)      | 98.99            | 92.14            | 99.15                 | 93.76            |

770

771

772

773 **Table 2.** The 50 most highly abundant transcripts in the *M. sativa* nodule transcriptome, with the  
774 average expression level in transcripts per million (TPM) and the functional annotation.

| Gene ID         | TPM    | Functional Prediction                                  |
|-----------------|--------|--------------------------------------------------------|
| Cluster-2.43518 | 30,662 | hypothetical protein (hypothetical leghaemoglobin)     |
| Cluster-2.26078 | 17,769 | Putative albumin I                                     |
| Cluster-2.23447 | 12,515 | hypothetical protein (hypothetical leghaemoglobin)     |
| Cluster-2.23176 | 8,065  | Nodulin-25                                             |
| Cluster-2.22272 | 7,992  | Putative Late nodulin                                  |
| Cluster-2.23033 | 6,778  | None                                                   |
| Cluster-2.21873 | 5,919  | hypothetical protein                                   |
| Cluster-2.22935 | 5,253  | Belongs to the globin family                           |
| Cluster-2.33070 | 5,232  | Putative ribonuclease H-like domain-containing protein |
| Cluster-2.24197 | 4,245  | Component of the replication protein A complex (RPA)   |
| Cluster-2.22983 | 4,196  | Belongs to the globin family                           |
| Cluster-2.24546 | 3,886  | Predicted NCR peptide (crp1450_Cluster-2.24546_0M_1)   |
| Cluster-2.19511 | 3,344  | None                                                   |
| Cluster-2.26207 | 3,296  | Extensin-like_protein_repeat                           |
| Cluster-2.49512 | 3,173  | Putative Blue (type 1) copper binding protein          |
| Cluster-2.21810 | 3,050  | Predicted NCR peptide (crp1160_Cluster-2.21810_0M_1)   |
| Cluster-2.22936 | 3,014  | Belongs to the globin family                           |
| Cluster-2.29430 | 2,789  | Putative Late nodulin                                  |
| Cluster-2.22881 | 2,788  | Predicted NCR peptide (crp1430_Cluster-2.22881_0M_1)   |
| Cluster-2.22836 | 2,509  | None                                                   |
| Cluster-2.23729 | 2,271  | hypothetical protein                                   |
| Cluster-2.22458 | 2,245  | Belongs to the globin family                           |
| Cluster-2.24829 | 2,227  | hypothetical protein                                   |
| Cluster-2.25168 | 2,209  | None                                                   |
| Cluster-2.24278 | 2,093  | Nodule-specific_GRP_repeat                             |
| Cluster-2.23928 | 2,038  | Late_nodulin_protein                                   |
| Cluster-2.22042 | 2,029  | None                                                   |
| Cluster-2.23245 | 2,019  | Putative translationally controlled tumor protein      |
| Cluster-2.25794 | 2,018  | Putative protein-synthesizing GTPase                   |
| Cluster-2.31376 | 1,957  | Predicted NCR peptide (crp1190_Cluster-2.31376_0M_1)   |
| Cluster-2.21809 | 1,939  | Predicted NCR peptide (crp1160_Cluster-2.21809_0M_1)   |
| Cluster-2.28083 | 1,854  | Predicted NCR peptide (crp1210_Cluster-2.28083_0M_1)   |
| Cluster-2.23524 | 1,844  | Early nodulin-16                                       |
| Cluster-2.34649 | 1,839  | Putative Late nodulin                                  |
| Cluster-2.16993 | 1,808  | hypothetical protein                                   |
| Cluster-2.21813 | 1,731  | None                                                   |
| Cluster-2.22457 | 1,705  | Belongs to the globin family                           |
| Cluster-2.28283 | 1,674  | None                                                   |
| Cluster-2.26205 | 1,621  | Predicted NCR peptide (crp1240_Cluster-2.26205_0M_1)   |
| Cluster-2.23310 | 1,607  | asparagine synthetase                                  |
| Cluster-2.21870 | 1,596  | Nodule-specific_GRP_repeat                             |
| Cluster-2.19604 | 1,583  | Predicted NCR peptide (crp1420_Cluster-2.19604_0M_1)   |
| Cluster-2.18485 | 1,509  | hypothetical protein                                   |
| Cluster-2.26876 | 1,458  | Predicted NCR peptide (crp1410_Cluster-2.26876_0M_1)   |
| Cluster-2.21536 | 1,441  | Ubiquitin_family                                       |
| Cluster-2.22785 | 1,408  | None                                                   |
| Cluster-2.23374 | 1,385  | Predicted NCR peptide (crp1420_Cluster-2.23374_0M_1)   |
| Cluster-2.28787 | 1,311  | Putative Late nodulin                                  |
| Cluster-2.22402 | 1,292  | Predicted NCR peptide (crp1520_Cluster-2.22402_0M_1)   |
| Cluster-2.30081 | 1,289  | Late nodulin protein                                   |

775

776 **Table 3.** The 50 most highly abundant transcripts in the *M. officinalis* nodule transcriptome, with  
777 the average expression level in transcripts per million (TPM) and the functional annotation.

| Gene ID            | TPM    | Functional Prediction                                                                           |
|--------------------|--------|-------------------------------------------------------------------------------------------------|
| Cluster-3554.18801 | 38,953 | Belongs to the globin family                                                                    |
| Cluster-3554.18778 | 14,091 | Belongs to the globin family                                                                    |
| Cluster-3554.16063 | 10,412 | Late_nodulin_protein                                                                            |
| Cluster-3554.15387 | 7,885  | Putative Late nodulin                                                                           |
| Cluster-3554.16088 | 6,146  | Putative Late nodulin                                                                           |
| Cluster-3554.18892 | 6,104  | None                                                                                            |
| Cluster-3554.15771 | 5,813  | Late_nodulin_protein                                                                            |
| Cluster-3554.18802 | 5,362  | Belongs to the globin family                                                                    |
| Cluster-3554.18596 | 5,347  | Predicted NCR peptide (crp1430_Cluster-3554.18596_0M_1)                                         |
| Cluster-3554.15456 | 3,912  | Putative translationally controlled tumor protein                                               |
| Cluster-3554.18808 | 3,864  | Belongs to the globin family                                                                    |
| Cluster-3554.33215 | 3,302  | hypothetical protein                                                                            |
| Cluster-3554.18775 | 3,097  | Putative Late nodulin                                                                           |
| Cluster-3554.23000 | 2,990  | Two predicted NCR peptide (crp1180_Cluster-3554.23000_0M_1 and crp1180_Cluster-3554.23000_0M_2) |
| Cluster-3554.36681 | 2,877  | Predicted NCR peptide (crp1500_Cluster-3554.36681_0M_1)                                         |
| Cluster-3554.21555 | 2,868  | Predicted NCR peptide (crp1430_Cluster-3554.21555_0M_1)                                         |
| Cluster-3554.16074 | 2,809  | Putative BURP domain-containing protein                                                         |
| Cluster-3554.29297 | 2,784  | hypothetical protein                                                                            |
| Cluster-3554.18196 | 2,723  | None                                                                                            |
| Cluster-3554.18256 | 2,571  | Predicted NCR peptide (crp1440_Cluster-3554.18256_0M_1)                                         |
| Cluster-3554.27063 | 2,522  | None                                                                                            |
| Cluster-3554.22577 | 2,449  | Putative Blue (type 1) copper binding protein                                                   |
| Cluster-3554.15361 | 2,409  | eEF1A                                                                                           |
| Cluster-3554.21311 | 2,384  | Belongs to the globin family                                                                    |
| Cluster-3554.18838 | 2,340  | Late_nodulin_protein                                                                            |
| Cluster-3554.18700 | 2,296  | Late_nodulin_protein                                                                            |
| Cluster-3554.11713 | 2,261  | None                                                                                            |
| Cluster-3554.18706 | 2,259  | None                                                                                            |
| Cluster-3554.23445 | 2,214  | None                                                                                            |
| Cluster-3554.17366 | 2,141  | Predicted NCR peptide (crp1430_Cluster-3554.17366_0M_1)                                         |
| Cluster-3554.23502 | 2,073  | hypothetical protein                                                                            |
| Cluster-3554.25153 | 2,009  | Metallothionein-like protein 2                                                                  |
| Cluster-3554.21451 | 1,953  | Belongs to the globin family                                                                    |
| Cluster-3554.28600 | 1,931  | hypothetical protein                                                                            |
| Cluster-3554.22971 | 1,849  | hypothetical protein                                                                            |
| Cluster-3554.18877 | 1,812  | Belongs to the glyceraldehyde-3-phosphate dehydrogenase family                                  |
| Cluster-3554.13172 | 1,732  | Predicted NCR peptide (crp1440_Cluster-3554.13172_0M_1)                                         |
| Cluster-3554.18195 | 1,704  | Zinc_knuckle                                                                                    |
| Cluster-3554.30751 | 1,653  | Putative Late nodulin                                                                           |
| Cluster-3554.21774 | 1,635  | Late_nodulin_protein                                                                            |
| Cluster-3554.13784 | 1,629  | Predicted NCR peptide (crp1420_Cluster-3554.13784_0M_1)                                         |
| Cluster-3554.24033 | 1,611  | Prolyl isomerase (PPIase)                                                                       |
| Cluster-3554.30294 | 1,556  | metallothionein-like protein                                                                    |
| Cluster-3554.24764 | 1,552  | None                                                                                            |
| Cluster-3554.18368 | 1,552  | Nucleoside diphosphate kinase 1                                                                 |
| Cluster-3554.25344 | 1,537  | Metallothionein-like protein 1                                                                  |
| Cluster-3554.23646 | 1,514  | None                                                                                            |
| Cluster-3554.9874  | 1,512  | Belongs to the universal ribosomal protein uL13 family                                          |
| Cluster-3554.18476 | 1,503  | Late_nodulin_protein                                                                            |
| Cluster-3554.31722 | 1,476  | Putative Late nodulin                                                                           |

778

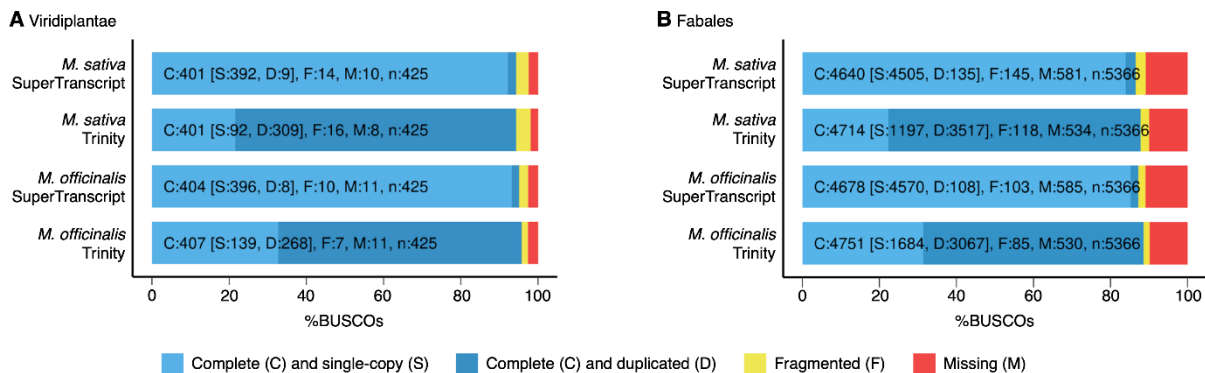

779

780

781 **Figure 1. Estimates of nodule transcriptome completeness.** Completeness of the *M. sativa* and  
782 *M. officinalis* nodule transcriptome assemblies was assessed using BUSCO with the (A)  
783 Viridiplantae and (B) Fabales single-copy marker gene datasets. The fraction of BUSCO genes  
784 identified as complete and single-copy (light blue), complete but duplicated (dark blue),  
785 fragmented (yellow), and missing (red) is shown.

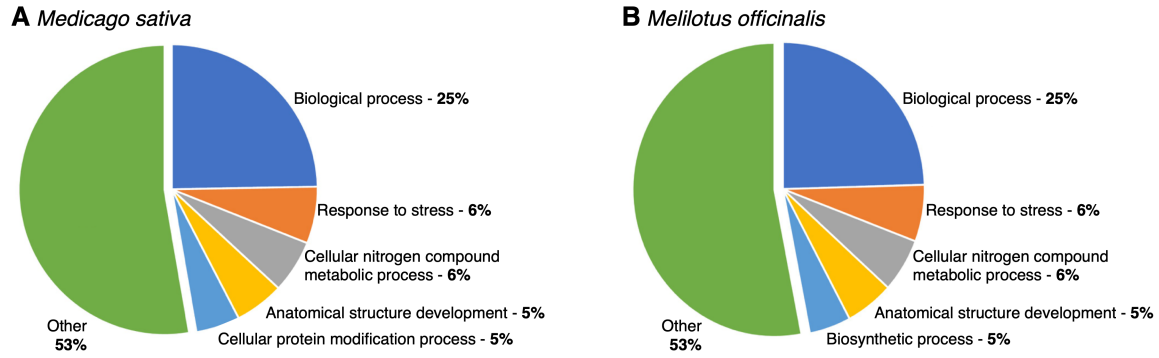

786

787

788

789

790

**Figure 2. Summary of the Slim GO Biological Processes annotations for the nodule transcriptomes.** Transcripts were annotated with Slim GO terms, and the annotations for the biological processes were summarized as pie charts for (A) *M. sativa* and (B) *M. officinalis*.

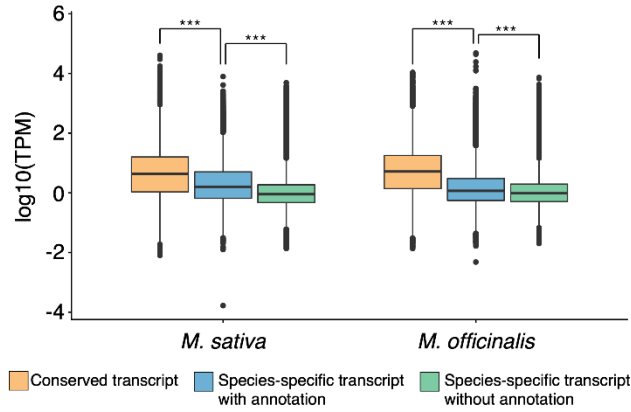

791

792 **Figure 3. Transcript abundances for conserved and species-specific transcripts.** Box plots  
793 displaying the distribution of average transcript abundances from triplicate samples, shown  
794 separately for genes with orthologs in both *M. sativa* and *M. officinalis* (orange), annotated  
795 transcripts found in only *M. sativa* or *M. officinalis* (blue), or transcripts that lack annotations and  
796 are found in only *M. sativa* or *M. officinalis* (green). Statistically significant differences between  
797 the distributions of a species are indicated with the asterisks ( $p$ -value  $< 1e^{-10}$ ; pairwise Wilcox  
798 tests).

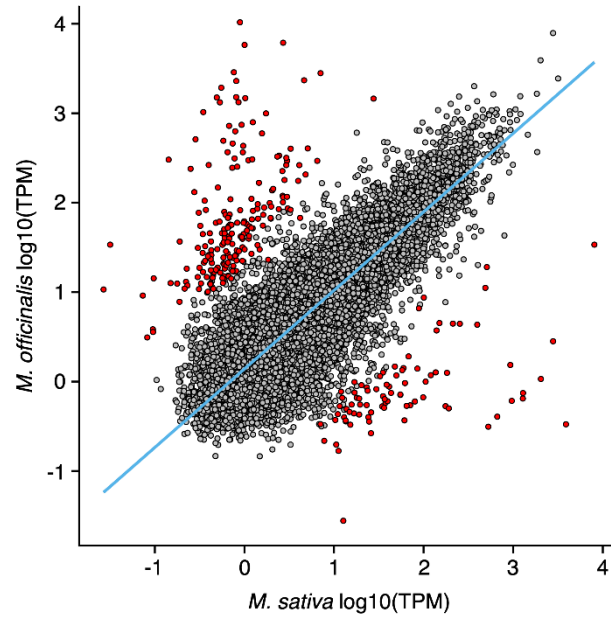

799

800 **Figure 4. Correlation between transcript abundances of orthologous transcripts in *M. sativa***  
801 **and *M. officinalis*.** Each datapoint represents the transcript abundance of single-copy orthologous  
802 transcripts in *M. sativa* and *M. officinalis*. Red datapoints represent transcripts that are  
803 differentially abundant between the two species ( $|\log_2(\text{fold change})| > 5$ , adjusted p-value  $< 0.01$ );  
804 all other datapoints are in grey. The blue line represents the robust linear regression line, calculated  
805 with the `rlm` function of the MASS package in R.

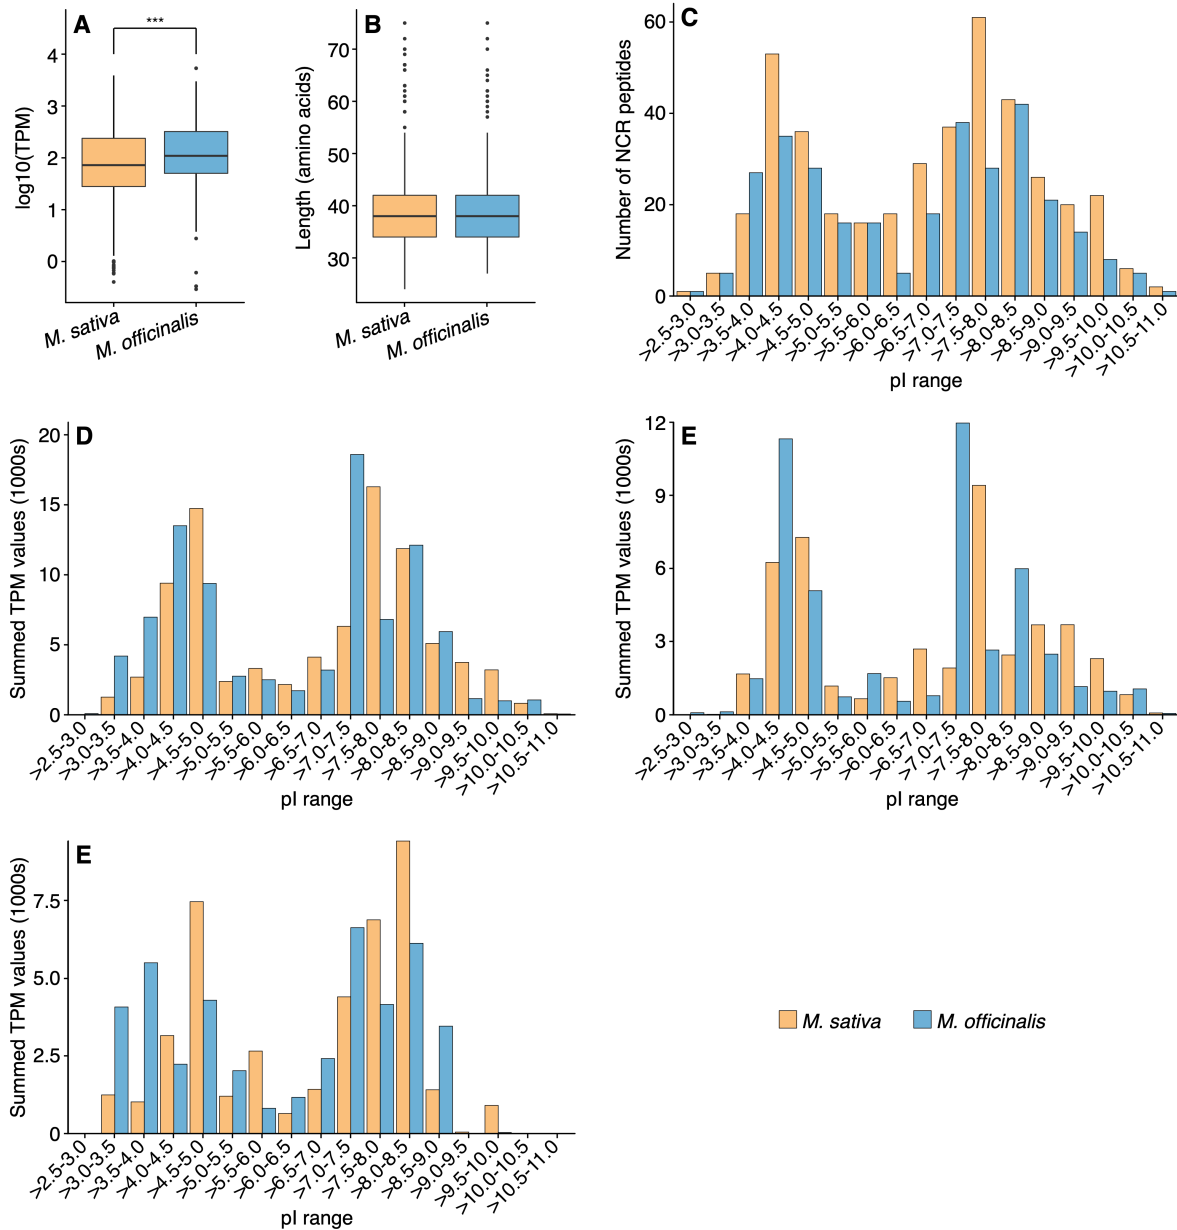

806

807

808

809

810

811

812

813

814

815

816

817

818

819

**Figure 5. NCR peptide profiles of *Medicago sativa* and *Melilotus officinalis*.** NCR peptides were predicted from the *M. sativa* (orange) and *M. officinalis* (blue) transcriptome assemblies, and the properties of the NCR peptides are shown in these graphs. (A) Box plots showing the distribution of the abundance (in transcripts per million, TPM) of NCR transcripts, based on triplicate samples. The difference in the distributions for the two species was statistically significant (p-value < 0.001; pairwise Wilcoxon test). (B) Box plots showing the distribution of the amino acid lengths of mature NCR peptides. No statistically significant difference in the distributions for the two species was detected. (C,D) Histograms showing the distributions of the isoelectric points (pI) for the mature NCR peptides. Histograms are based either on the number of NCR peptides with a given pI value (C) or the total abundance of the transcripts encoding NCR peptides with a given pI value (D). (E,F) Histograms showing distributions of pI for 4-cysteines (E) and 6-cysteines (F) mature NCR peptides based on total abundance of the transcripts encoding NCR peptides with a given pI value.
